# Supplementary material
Source: publisher figshare collection journal article supplement (https://asha.figshare.com/articles/dataset/_/21200422)

# Welcome back to Boys Town National Research Hospital!

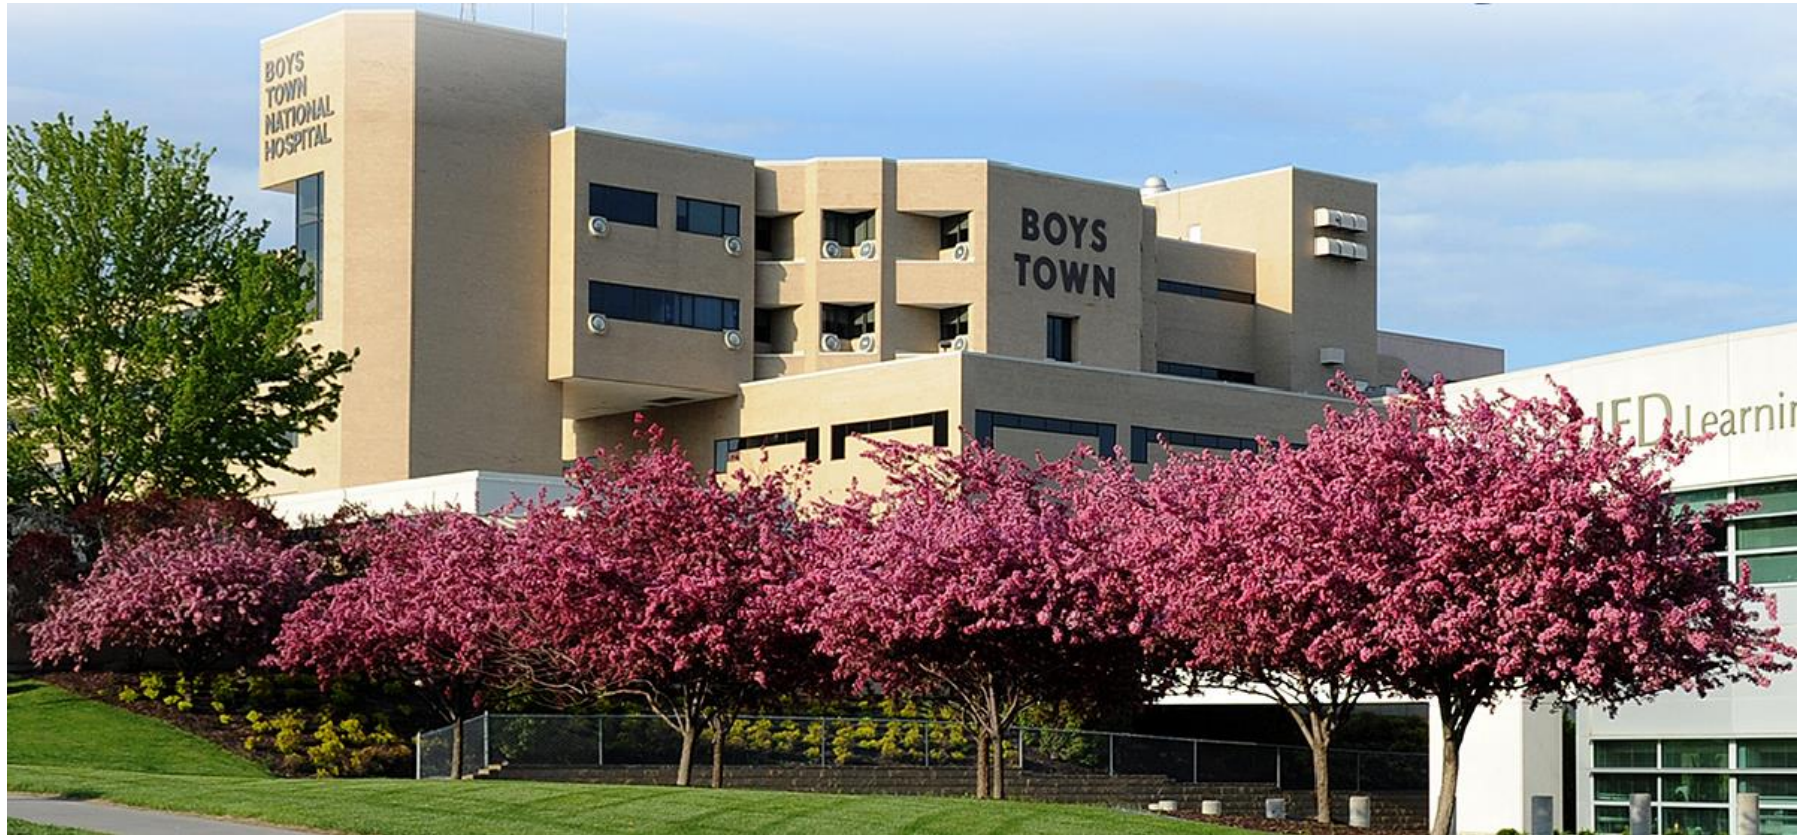

# Here is our lab!

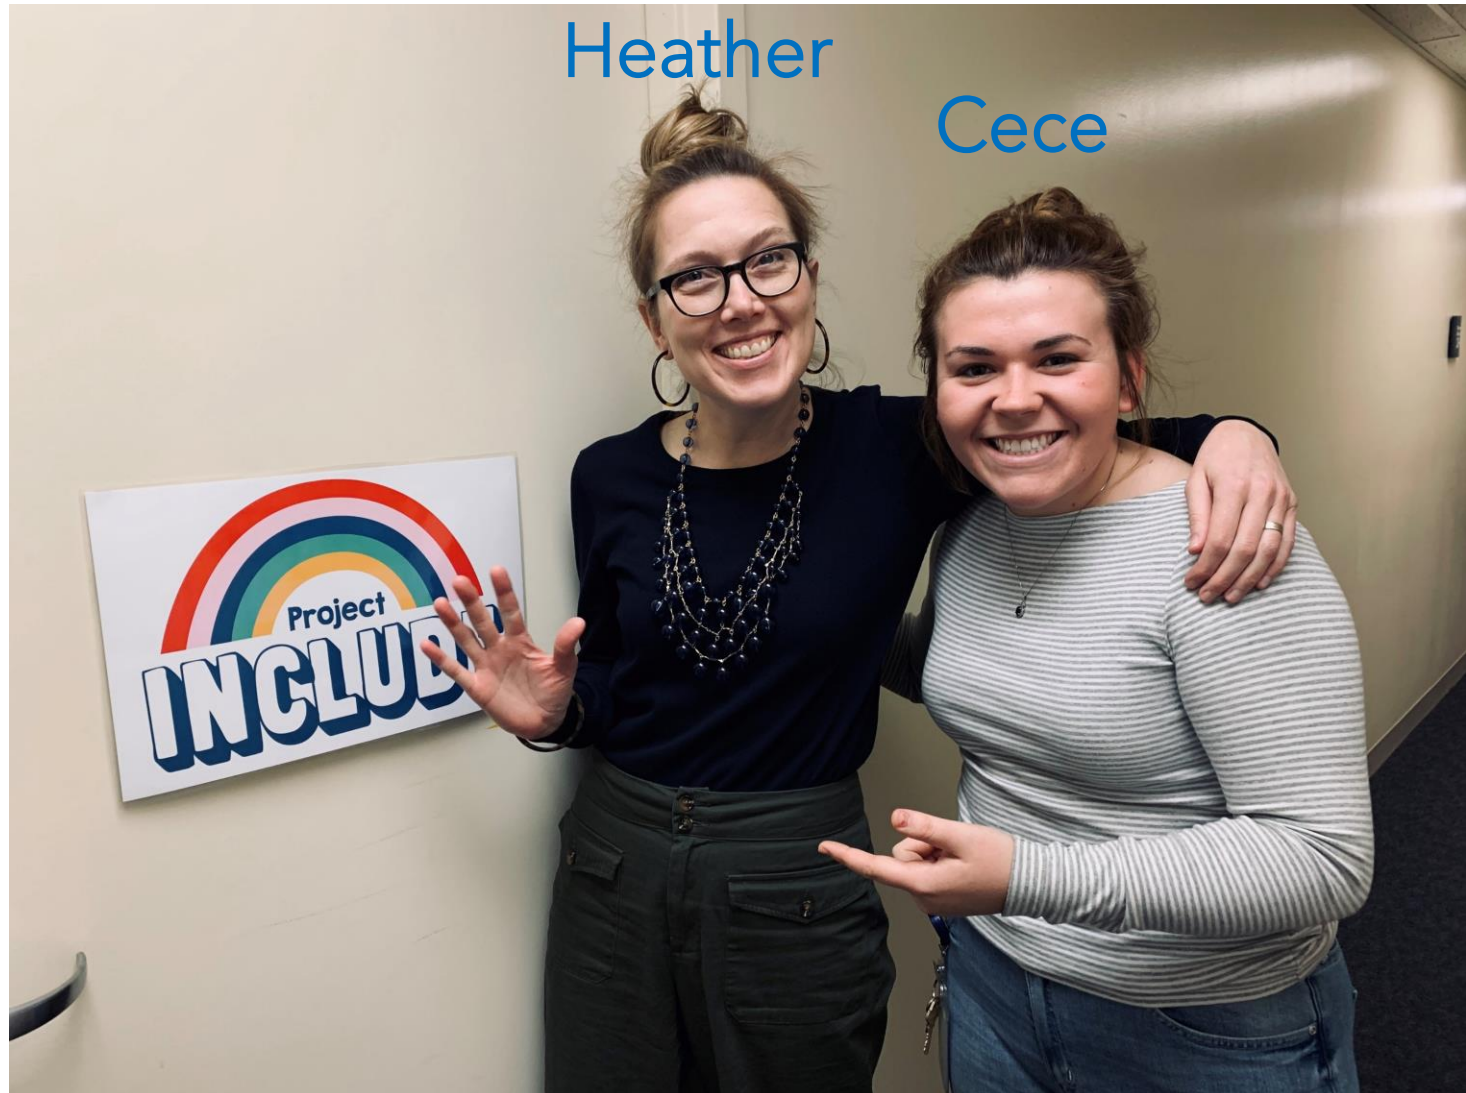

Heather

Cece



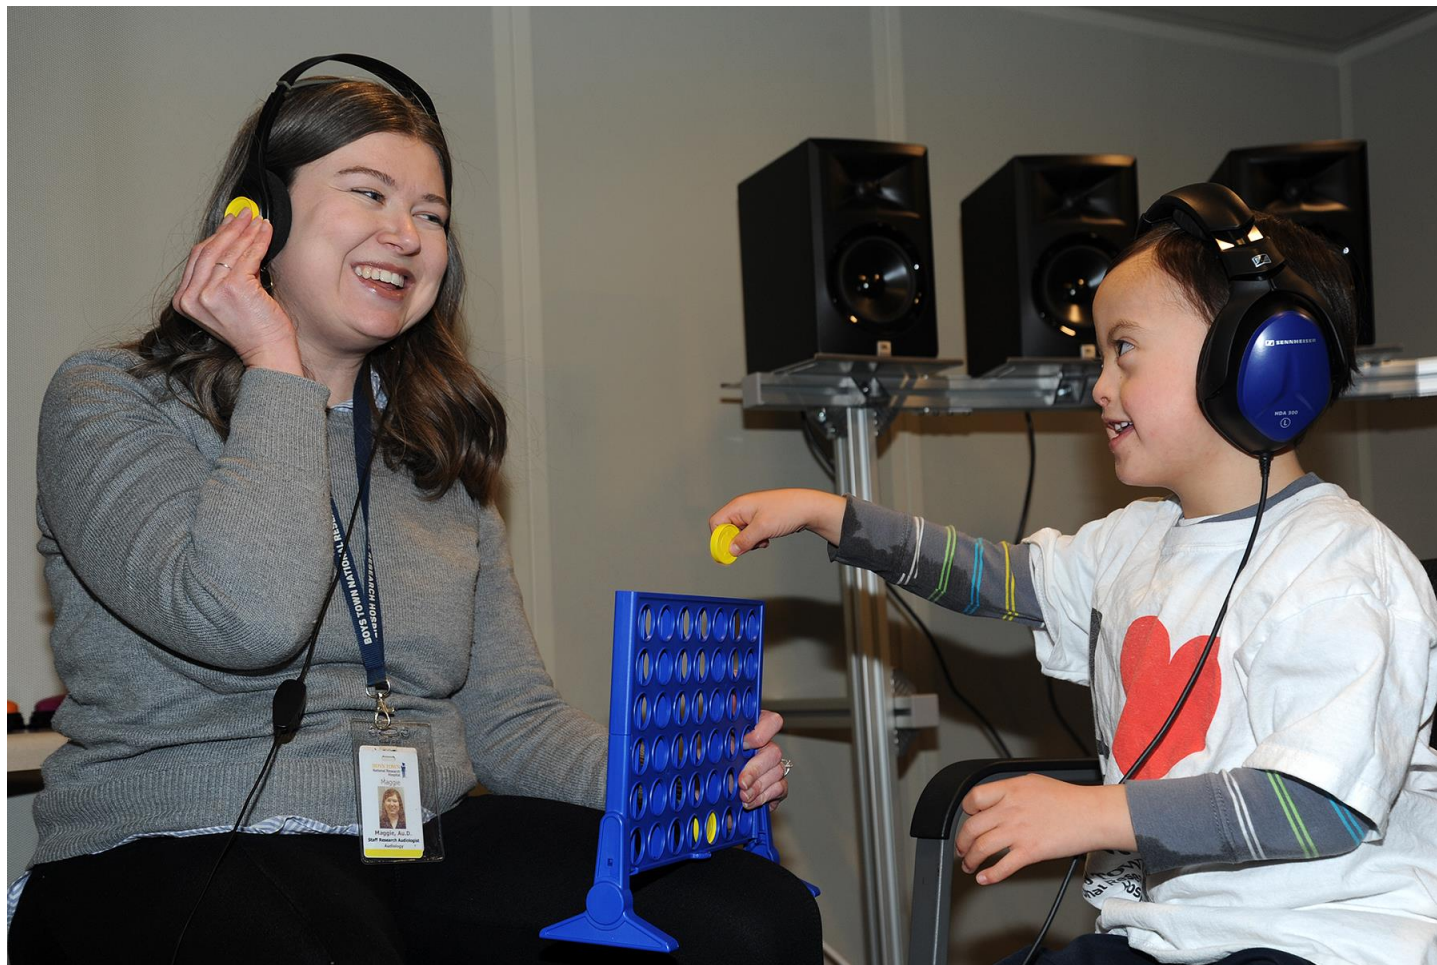

You will play listening games!

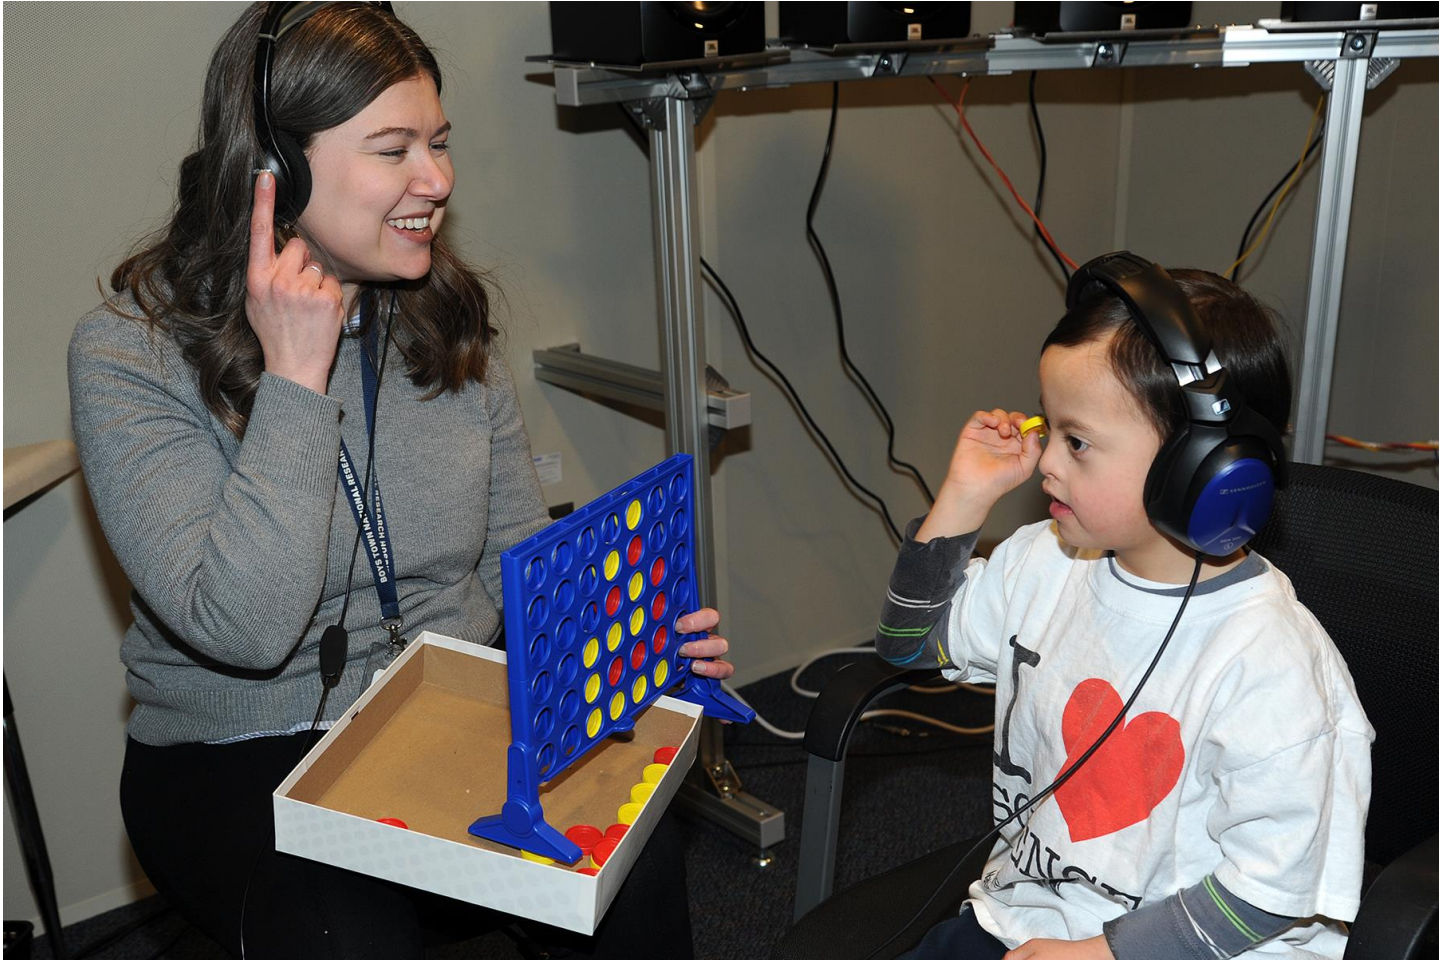

You will wait to hear beeps...



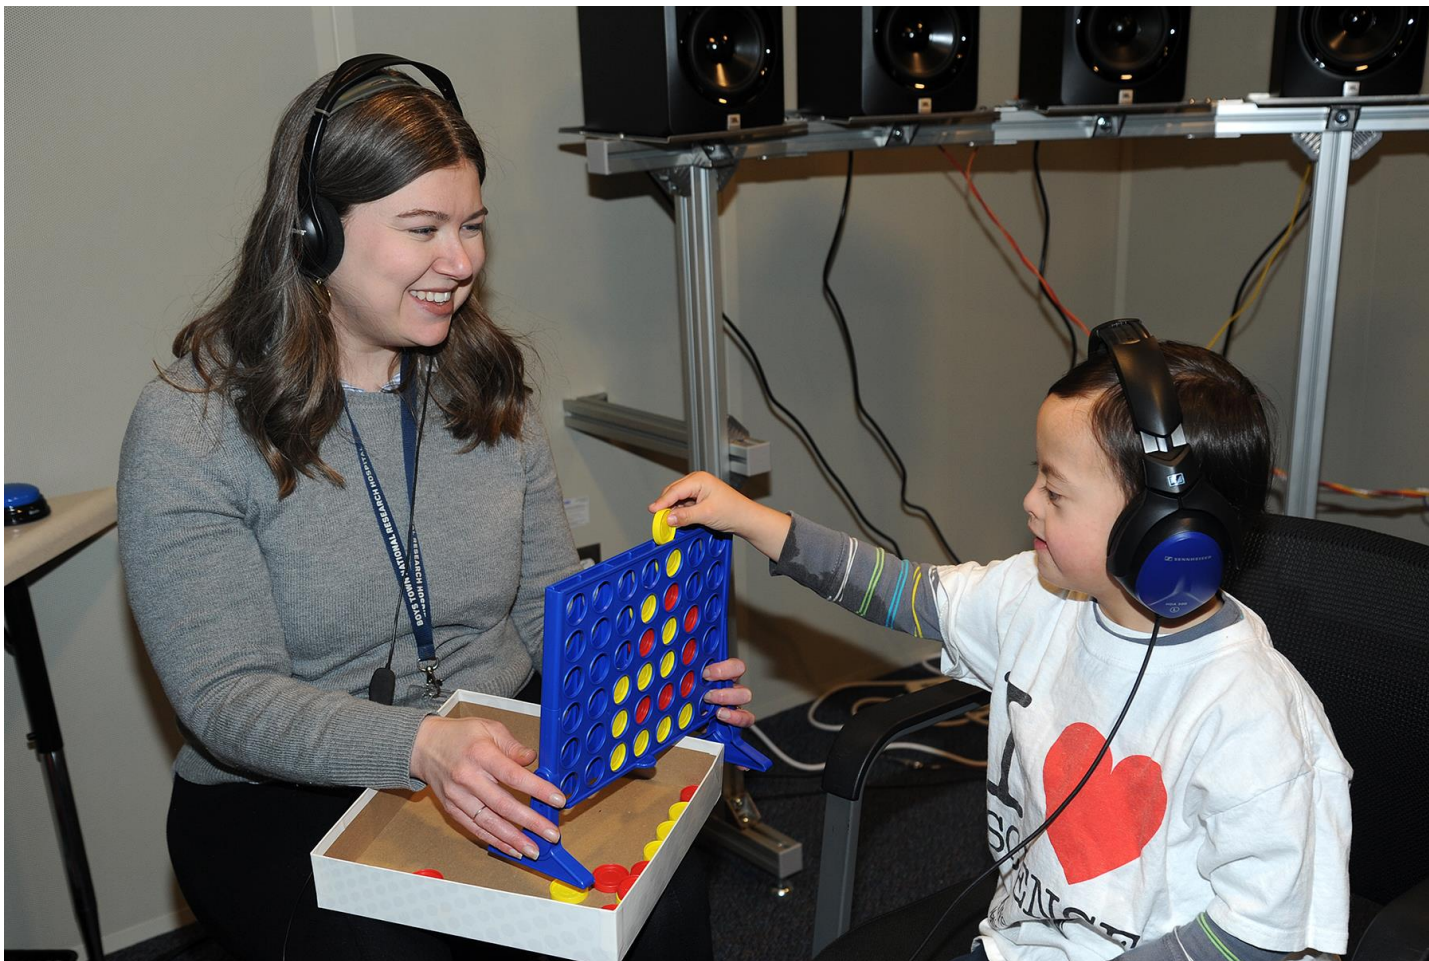

...and then put checkers in.

# Listening can be fun!

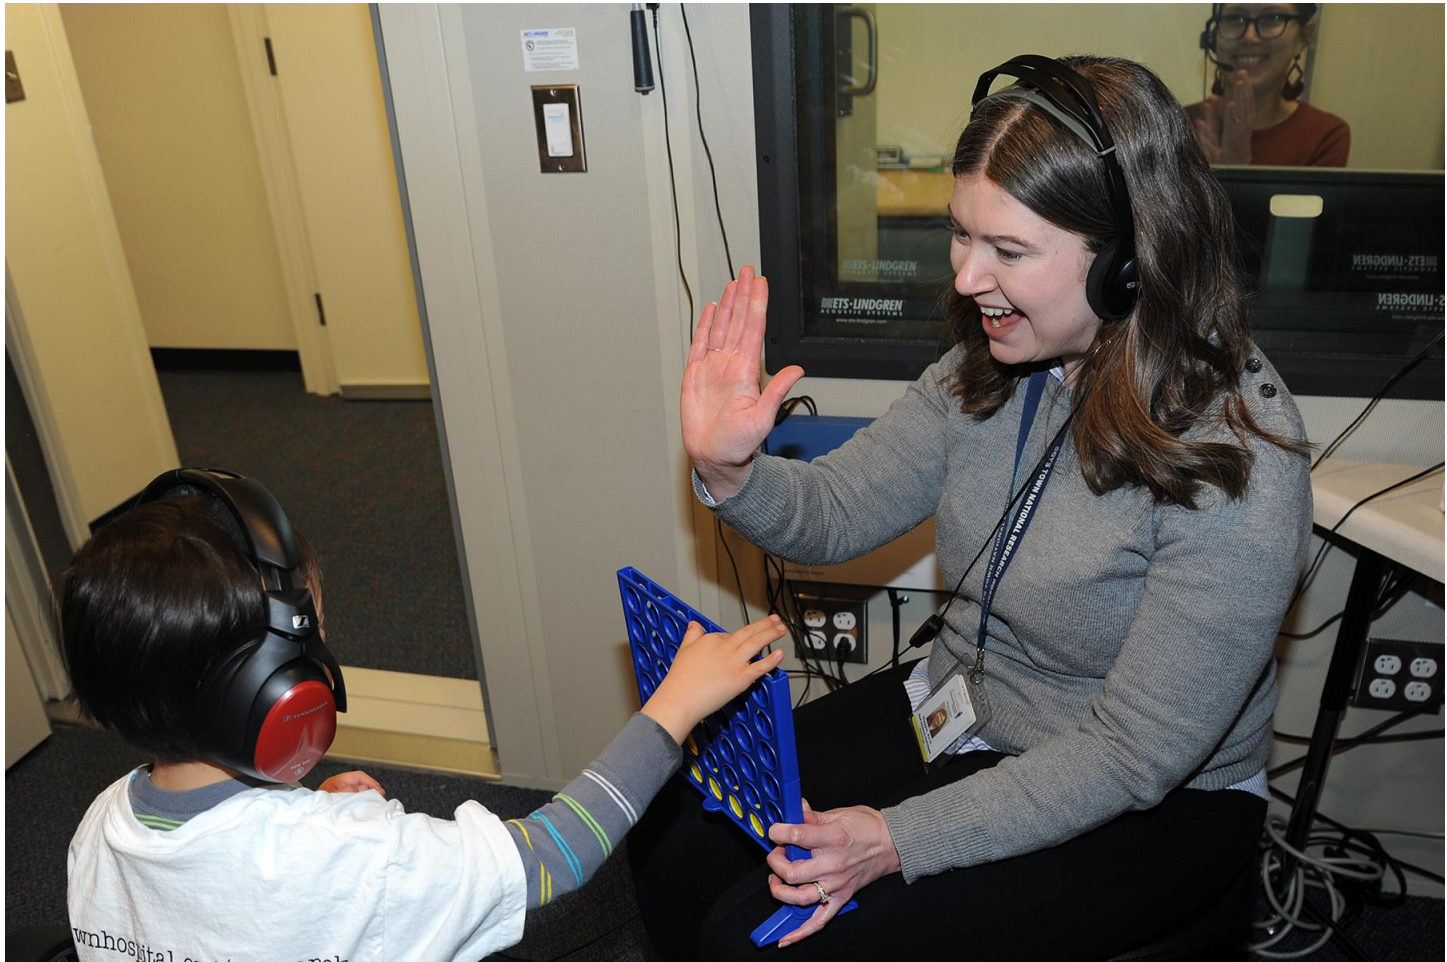



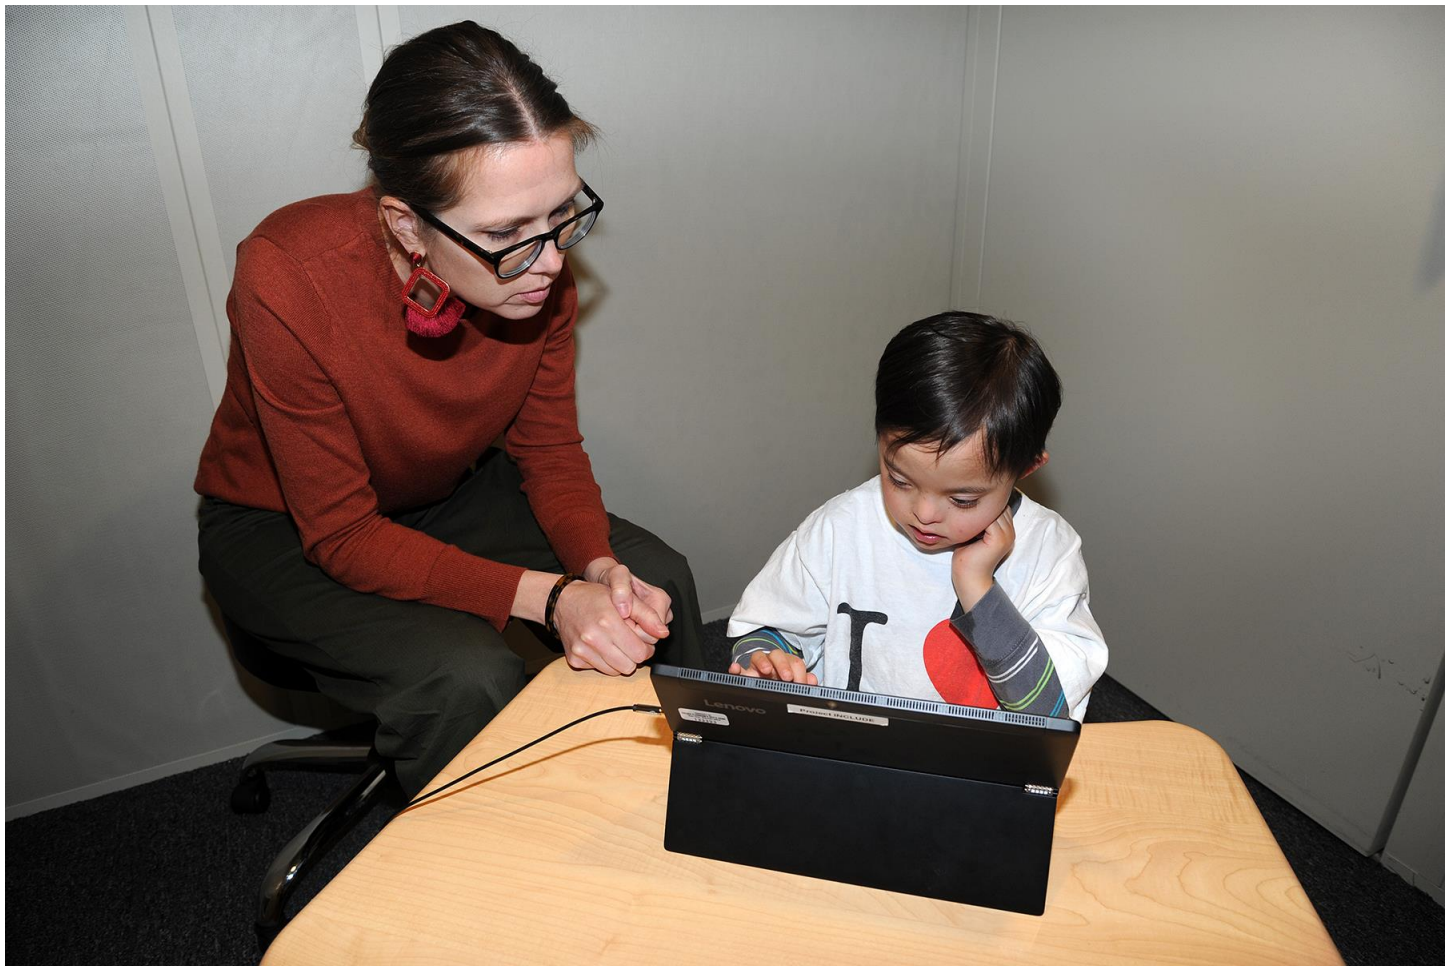

You will sit at a computer.

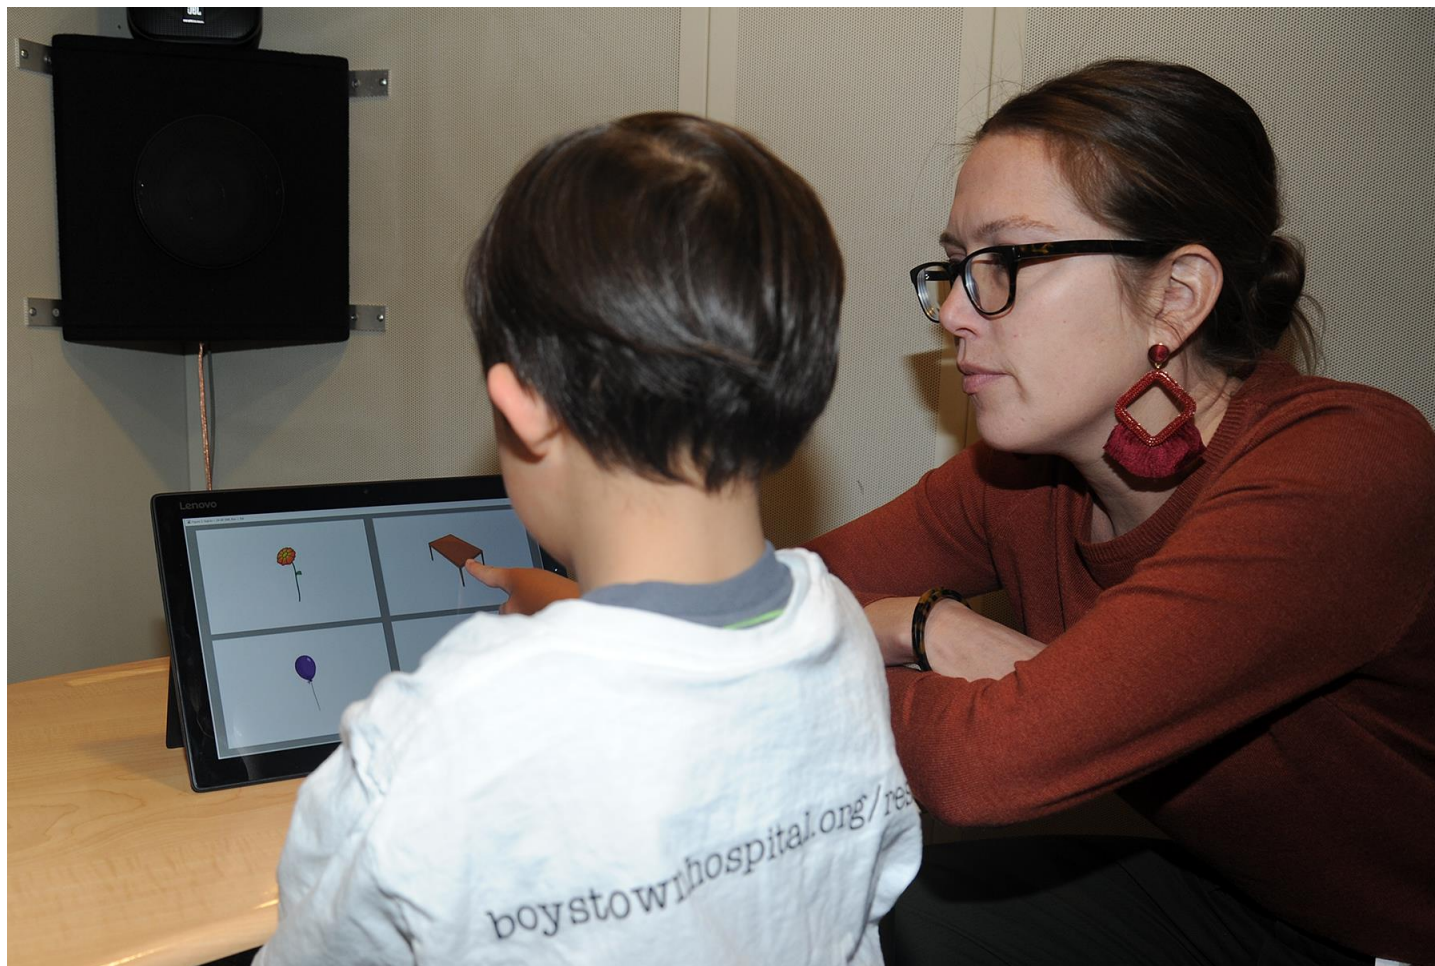

You will pick the word you hear.



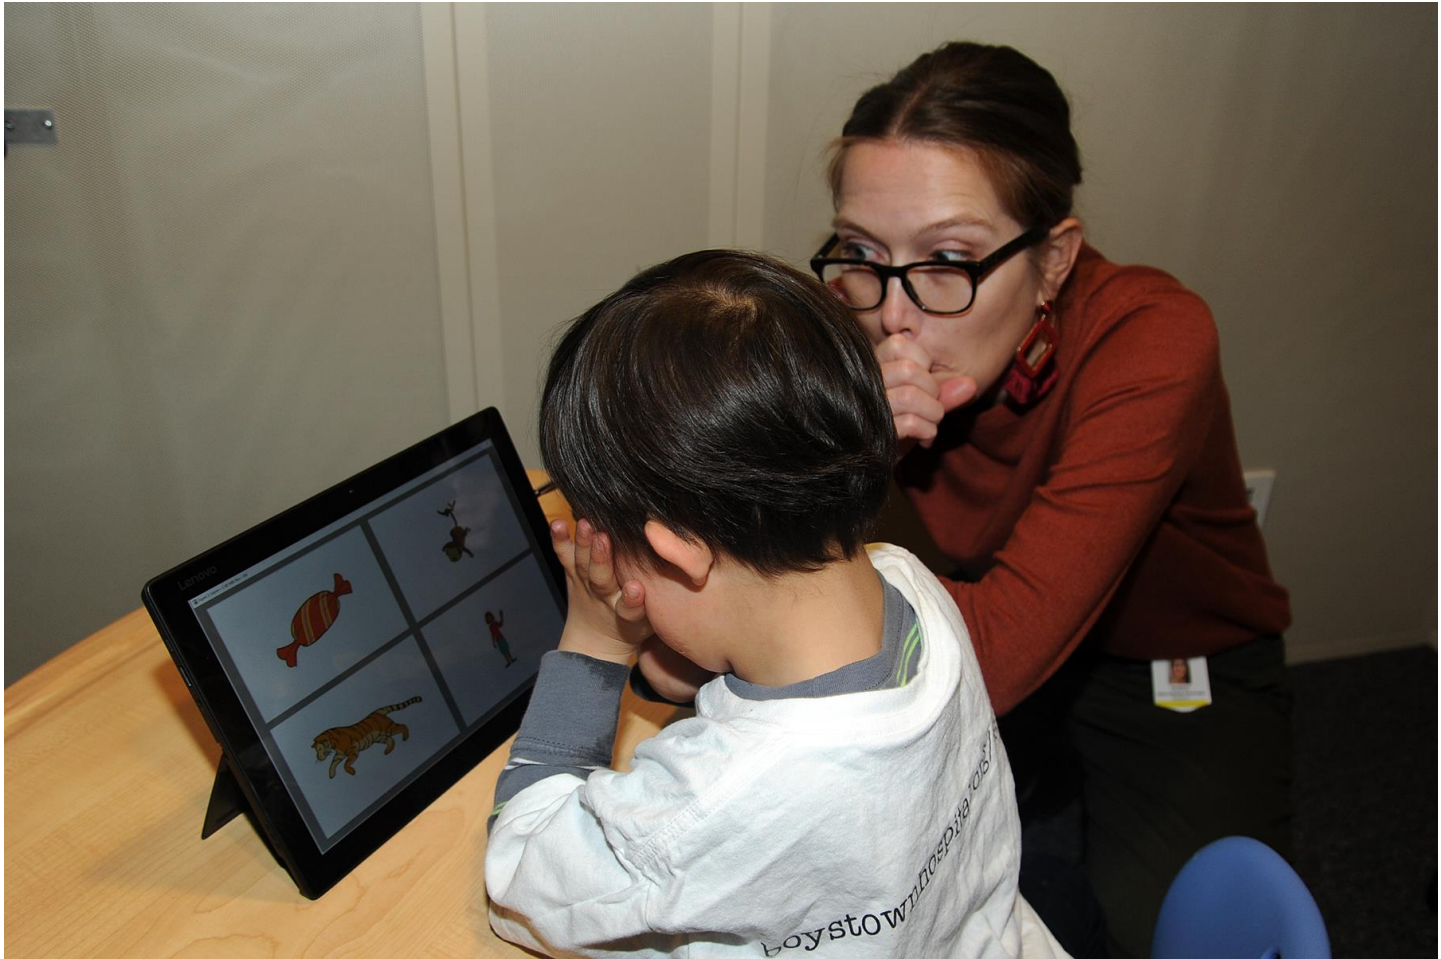

It can be tricky!

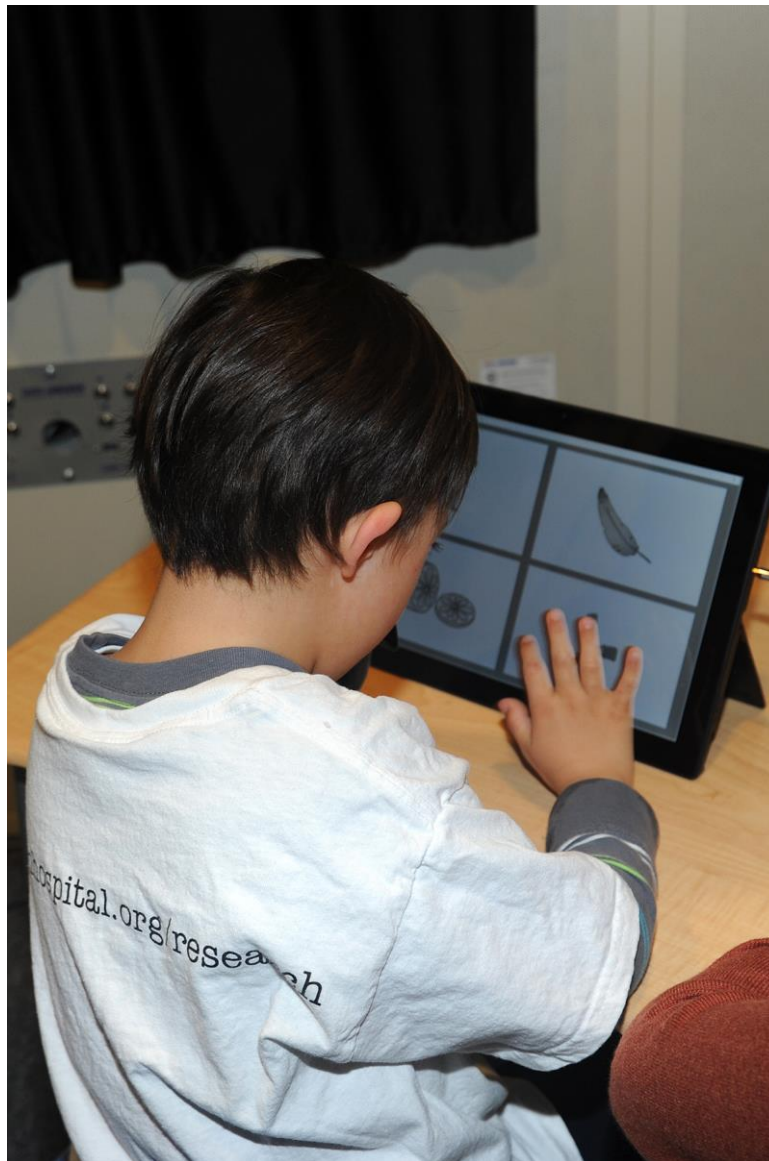

But it is always okay to guess!



# You will take breaks!

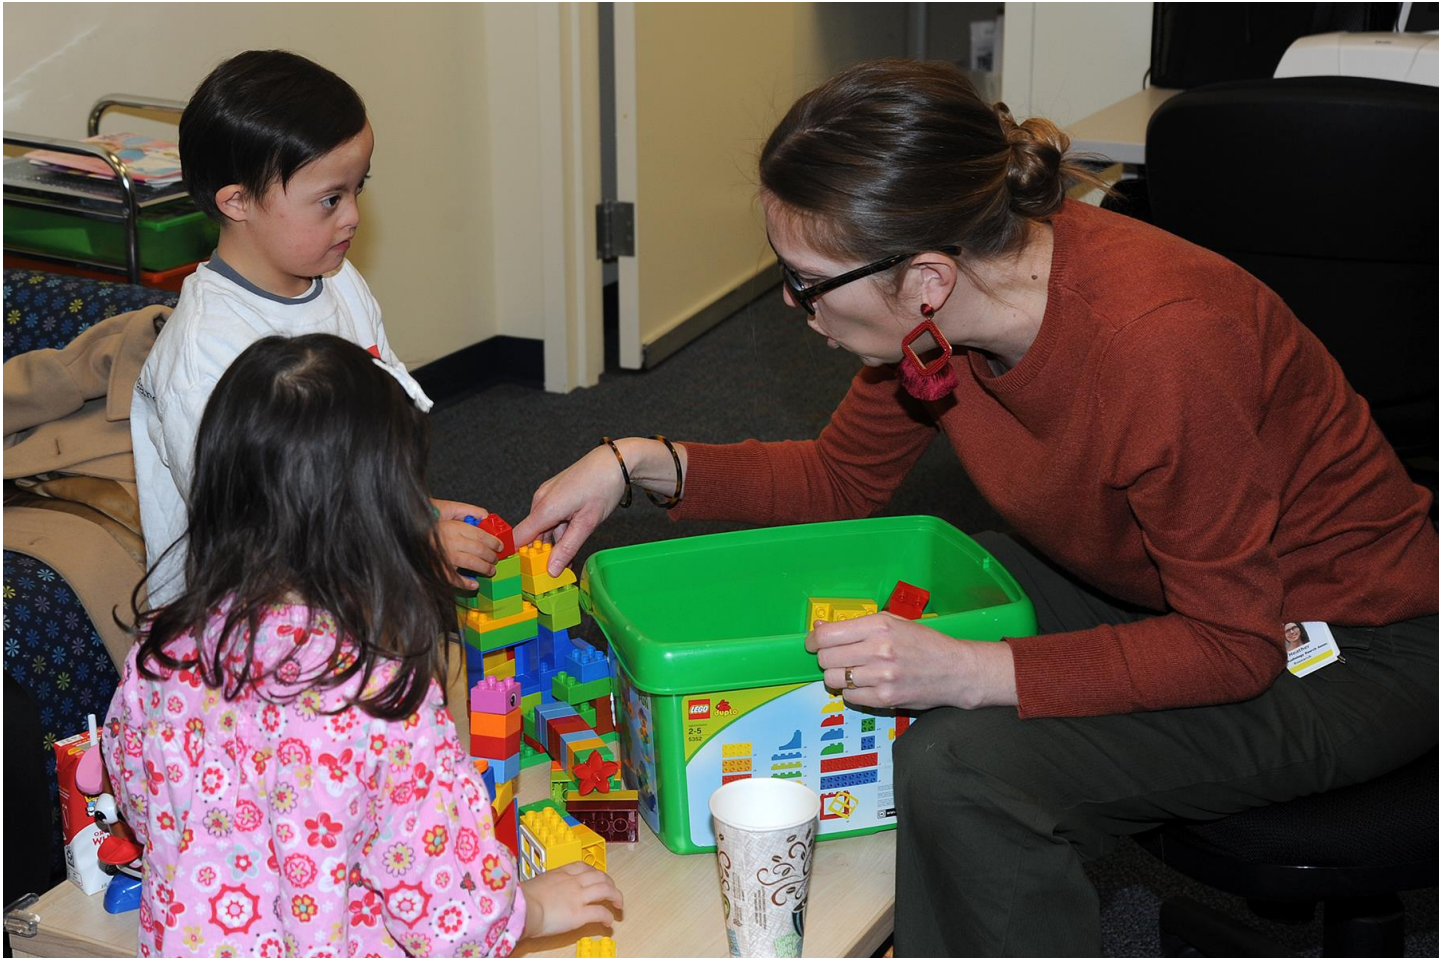

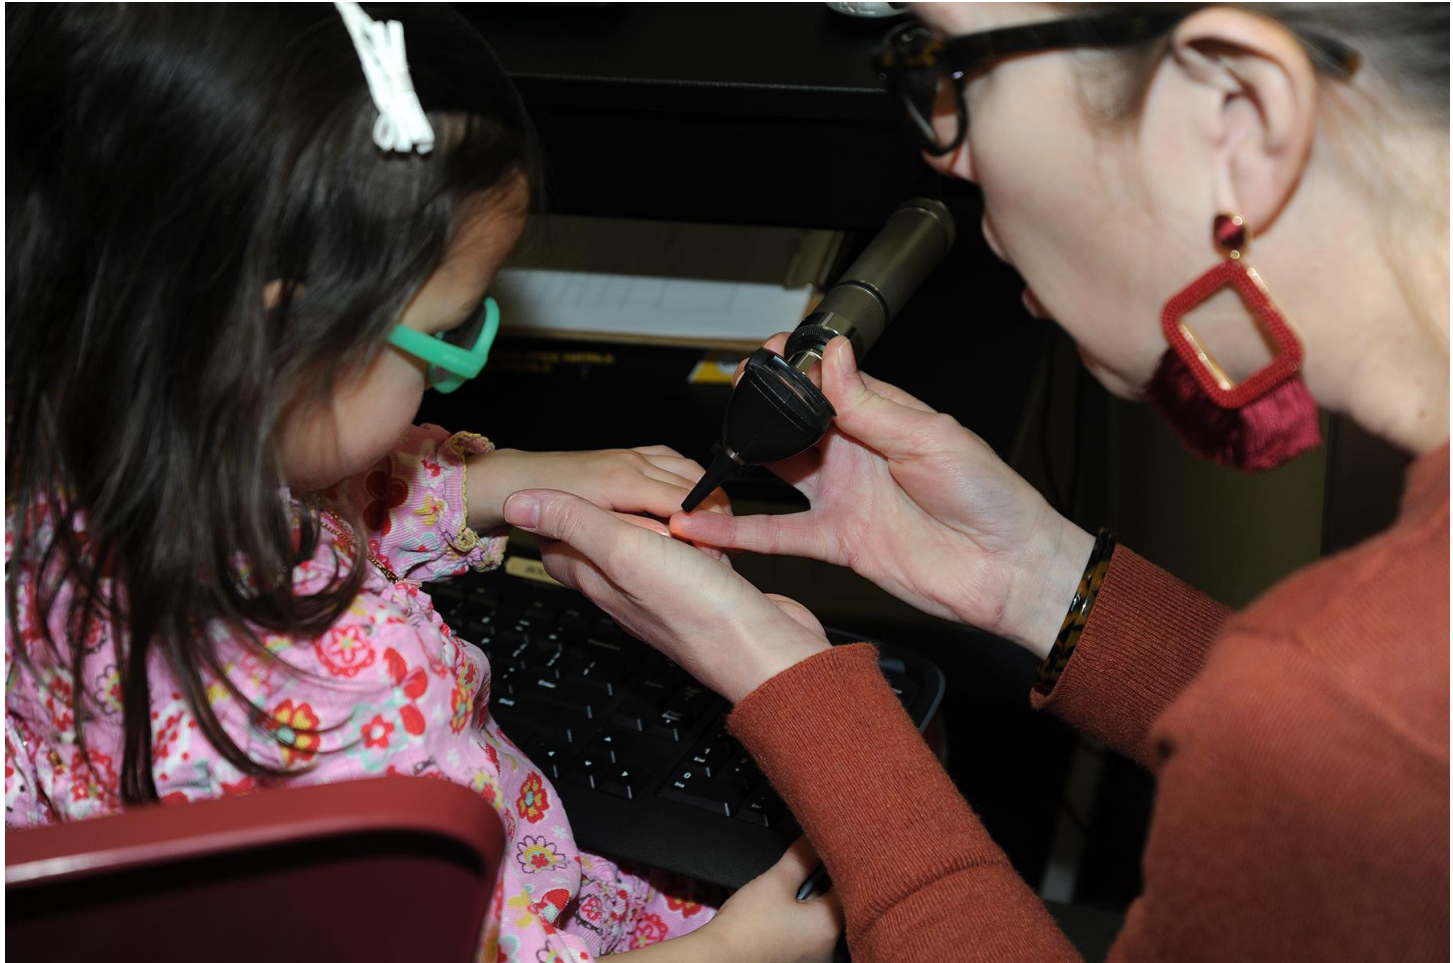

You will see an ear light.



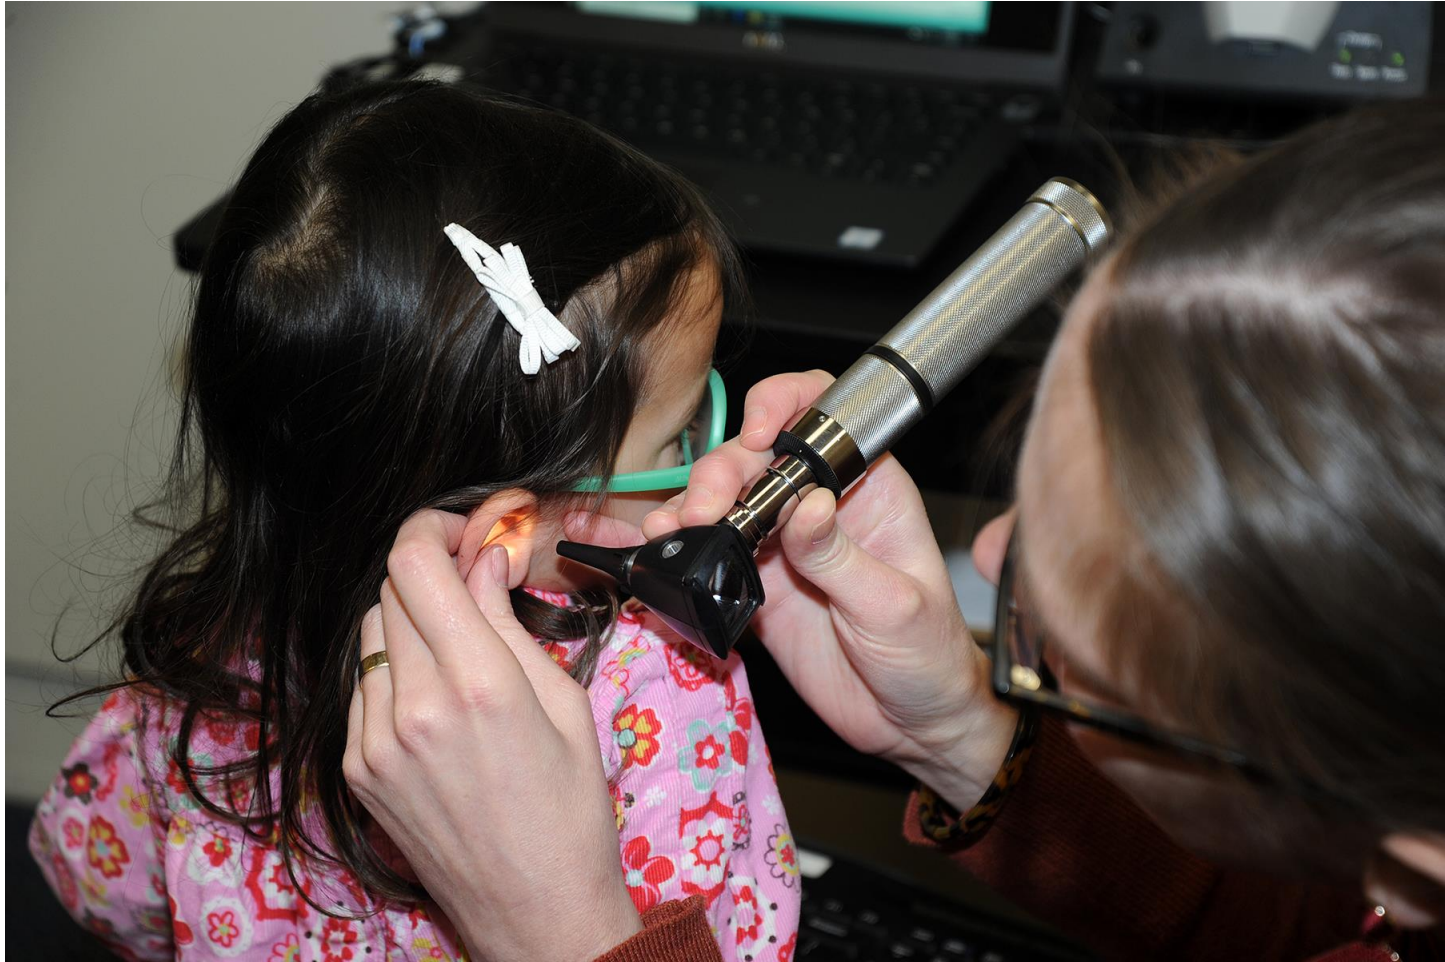

We will look in your ear.

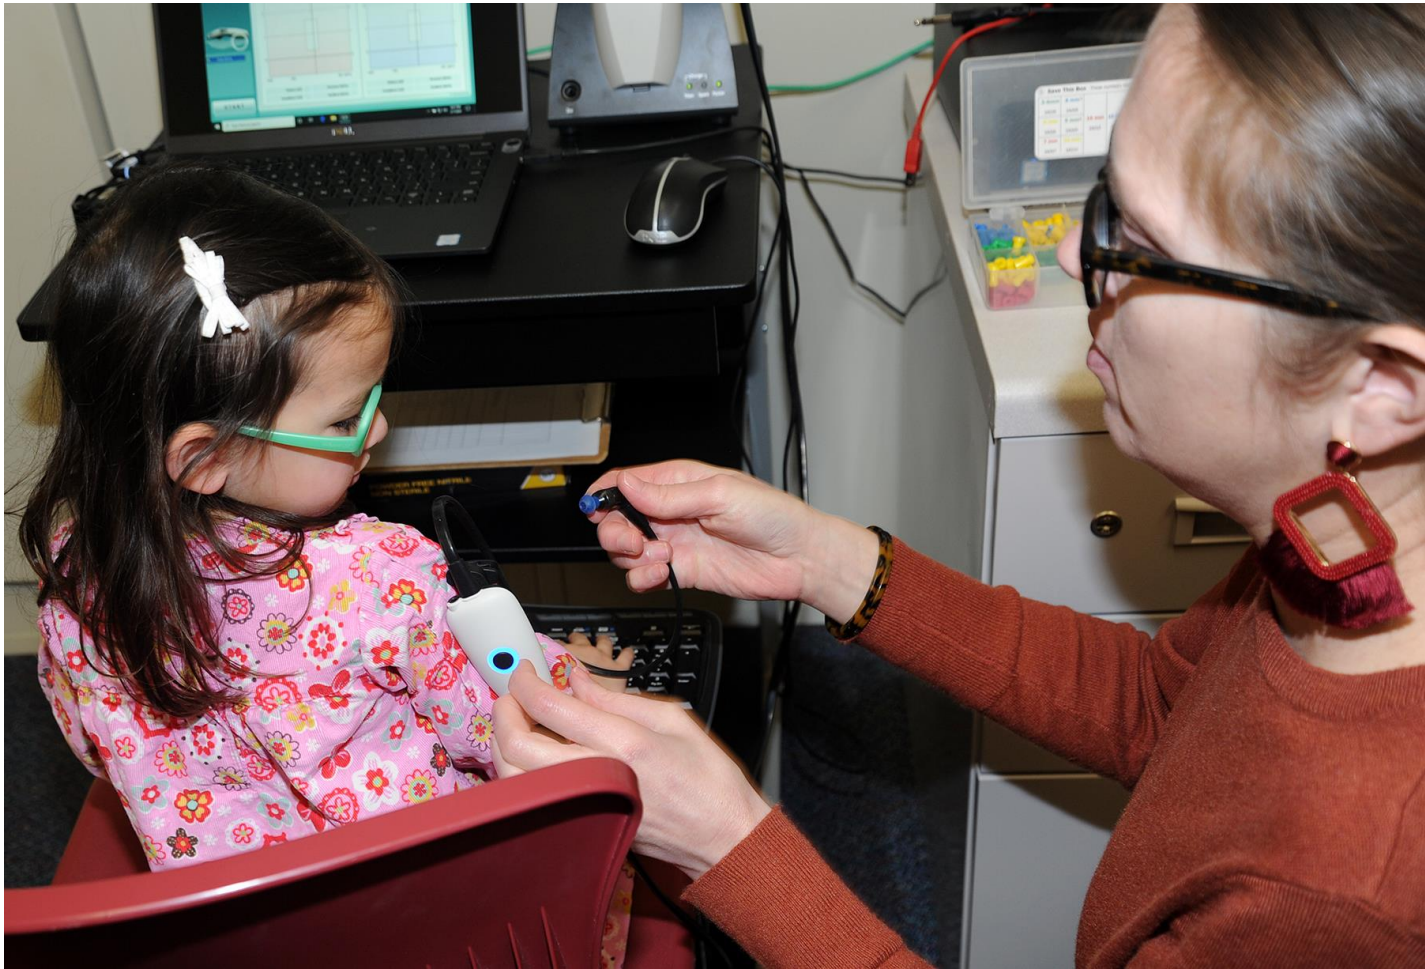

You will see a squishy ear tip.



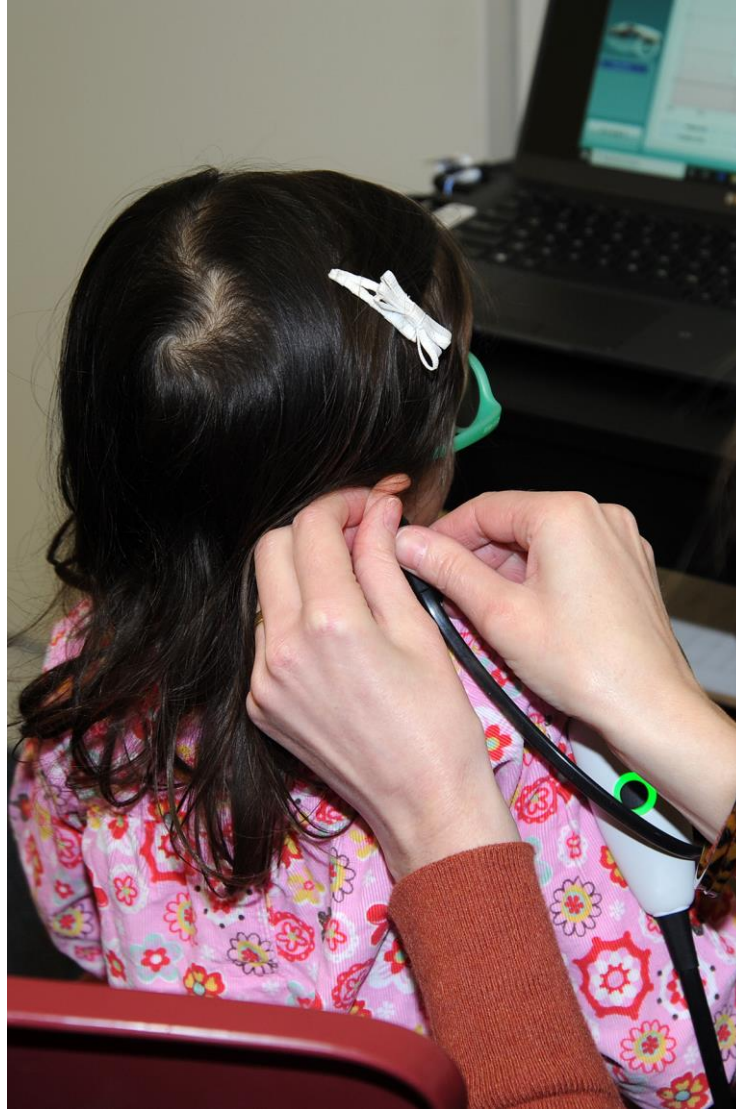

The squishy tip will go in your ear.

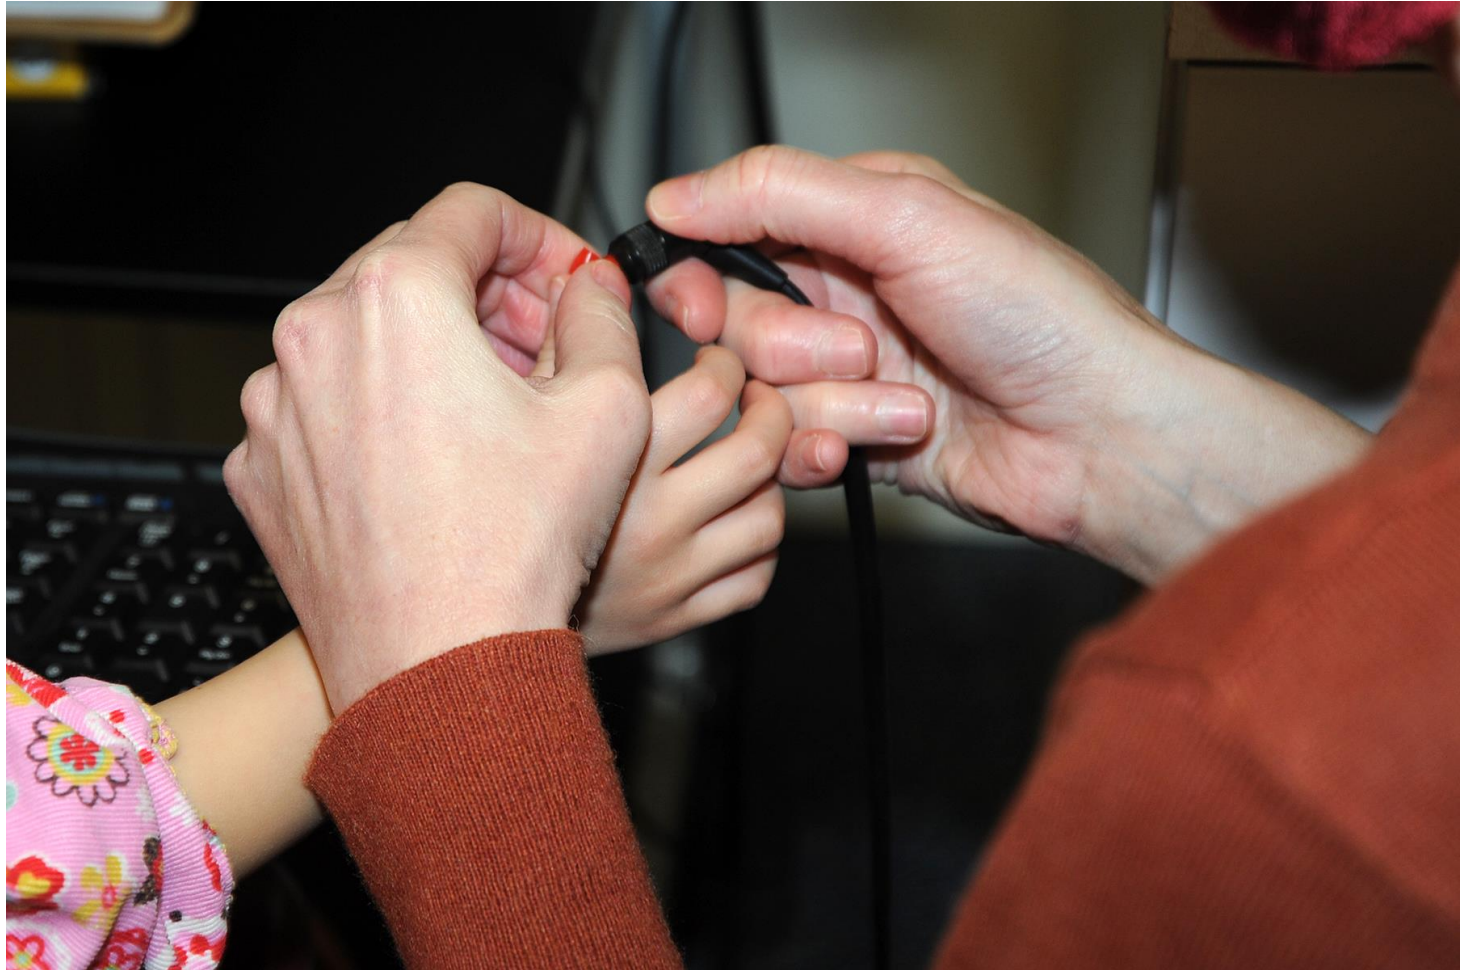

It feels like a big kiss!



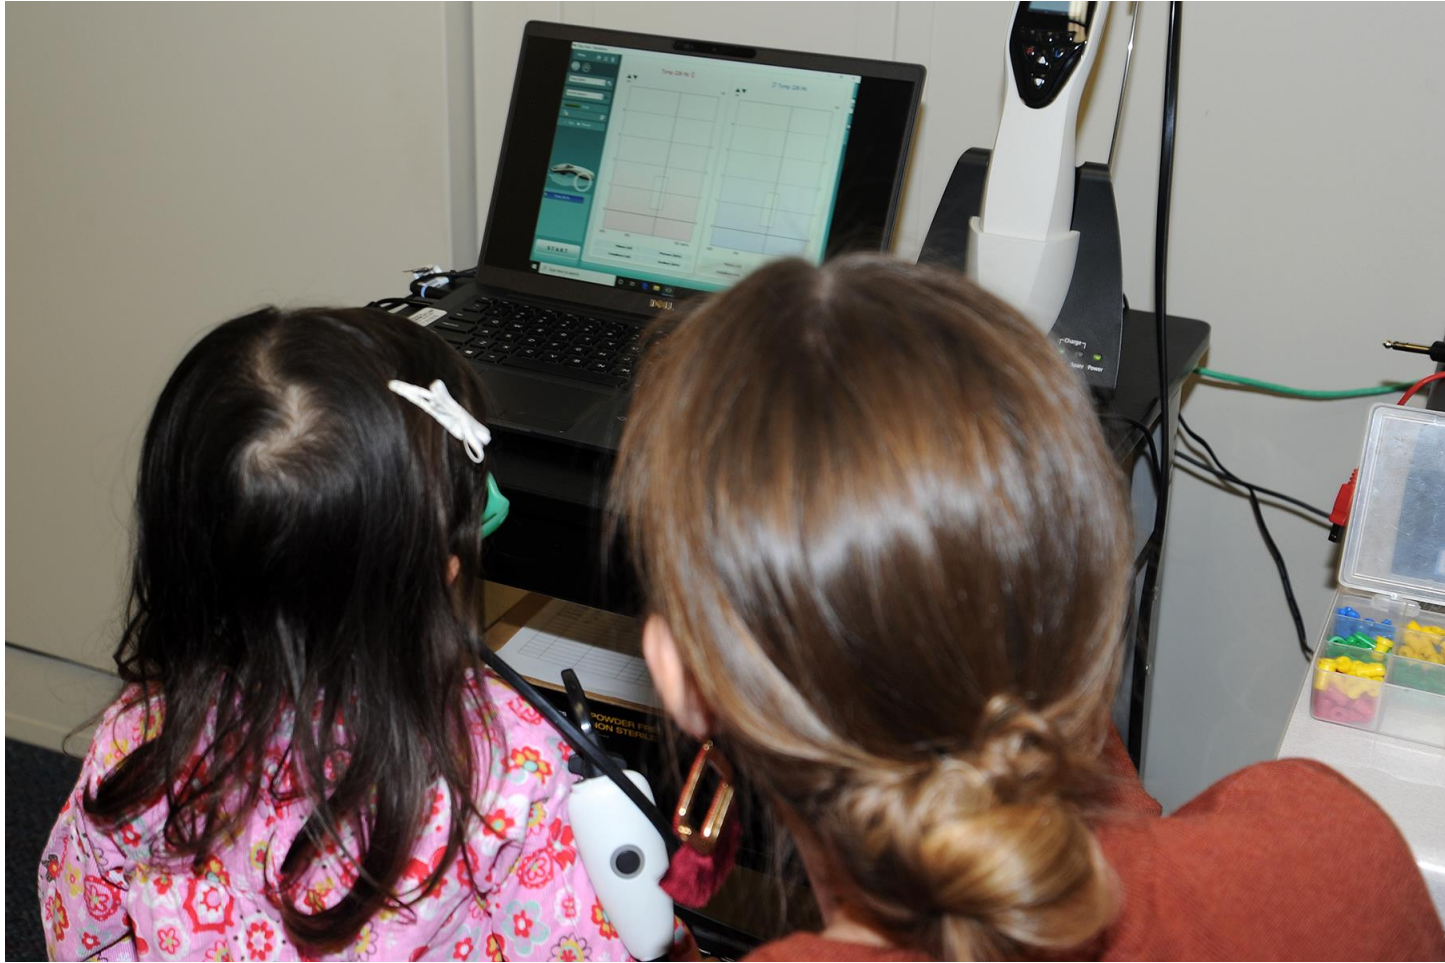

The computer will measure your ear.

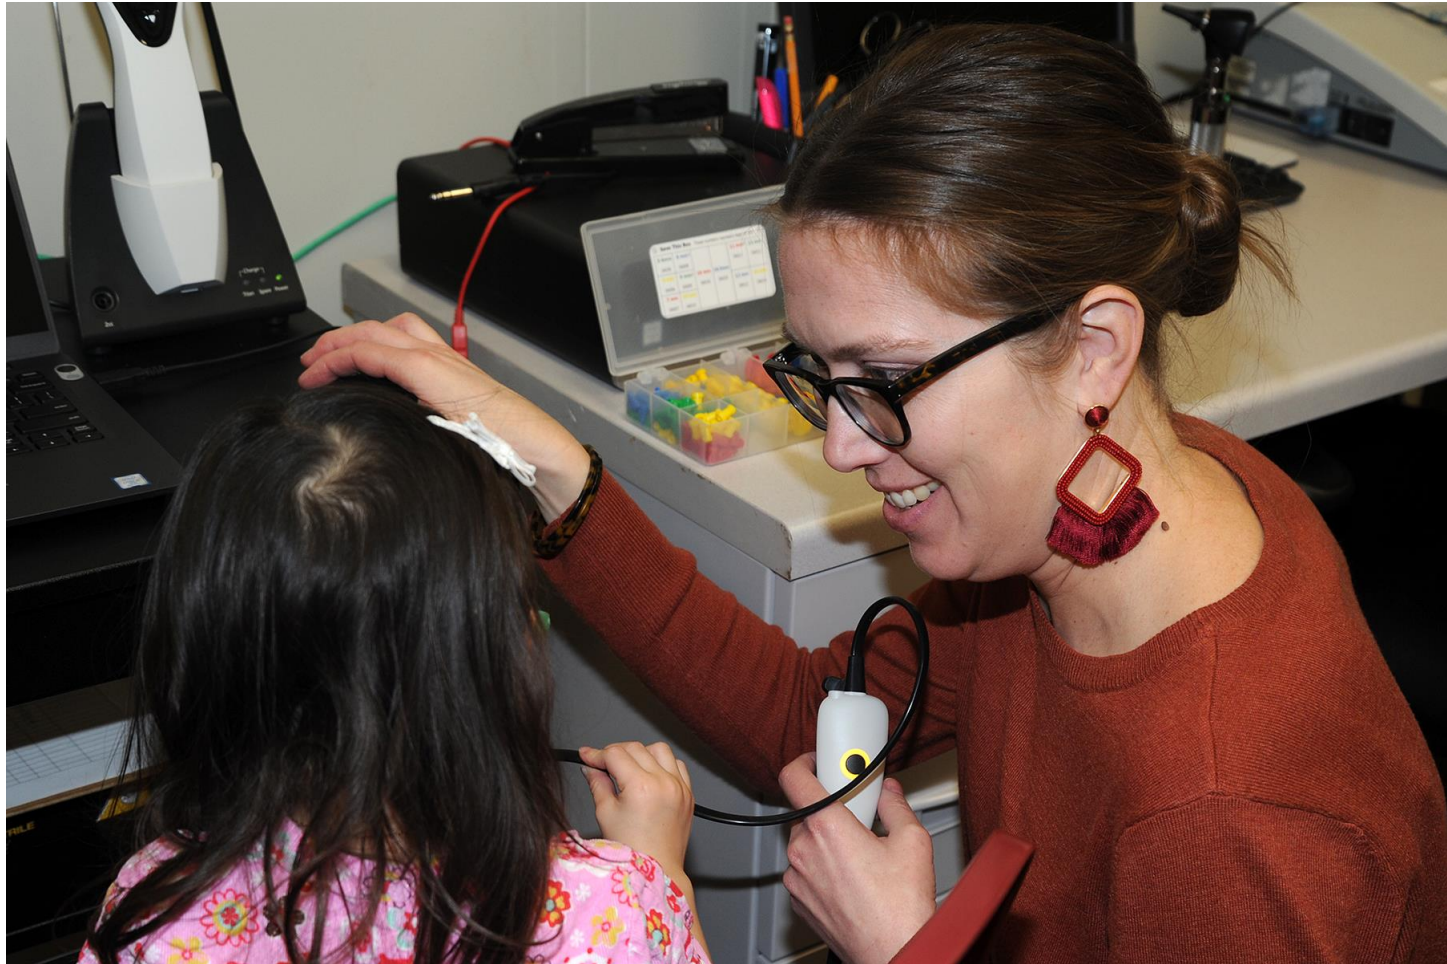

The computer makes  
funny sounds!



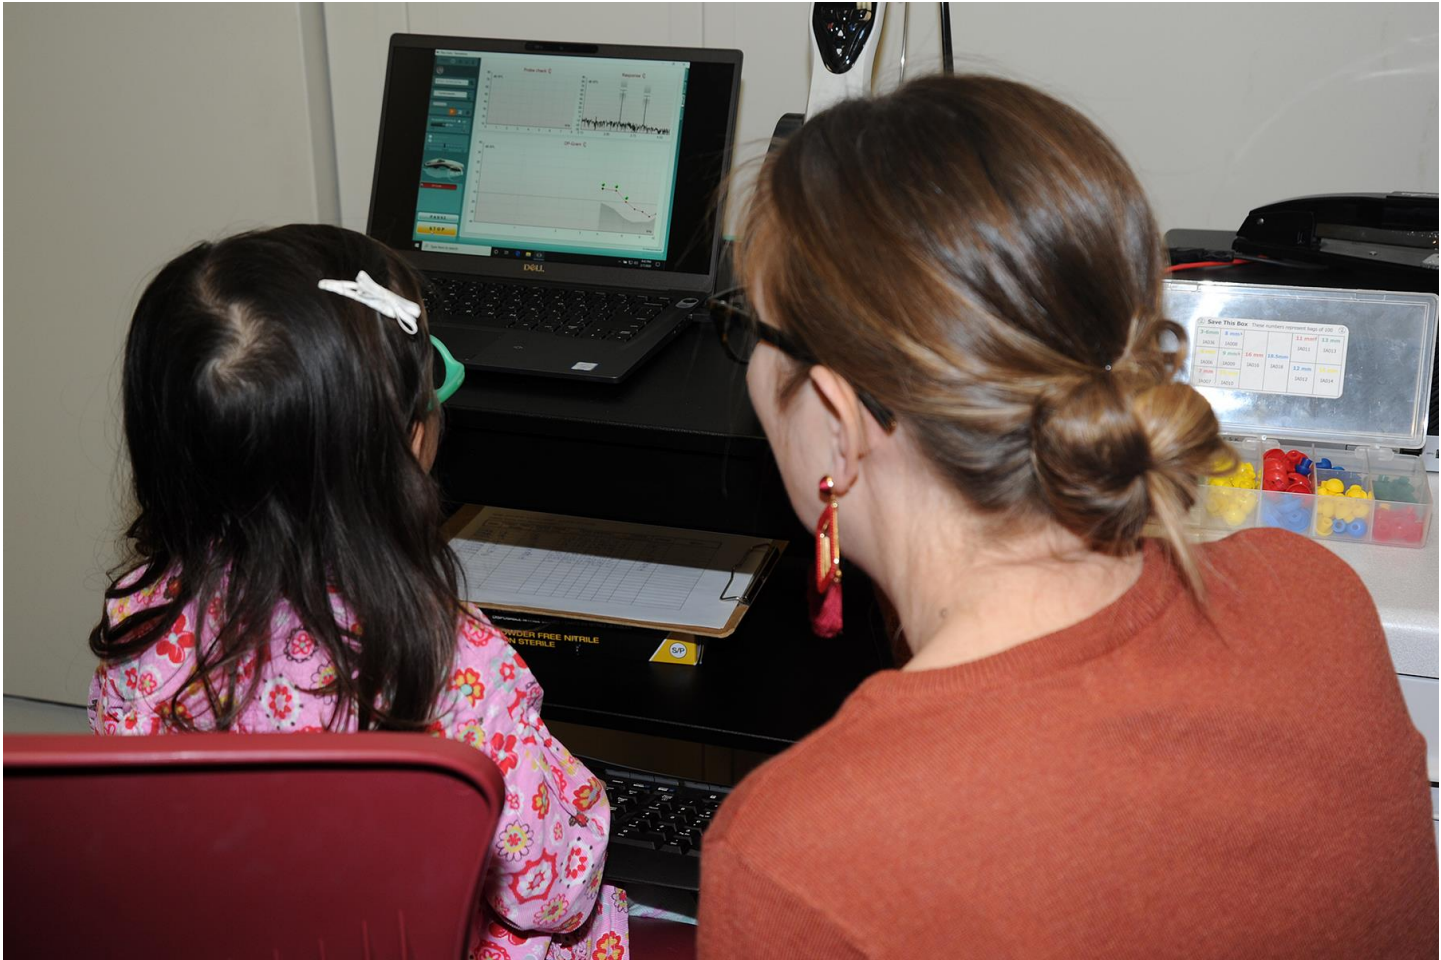

It sounds like robot birds!

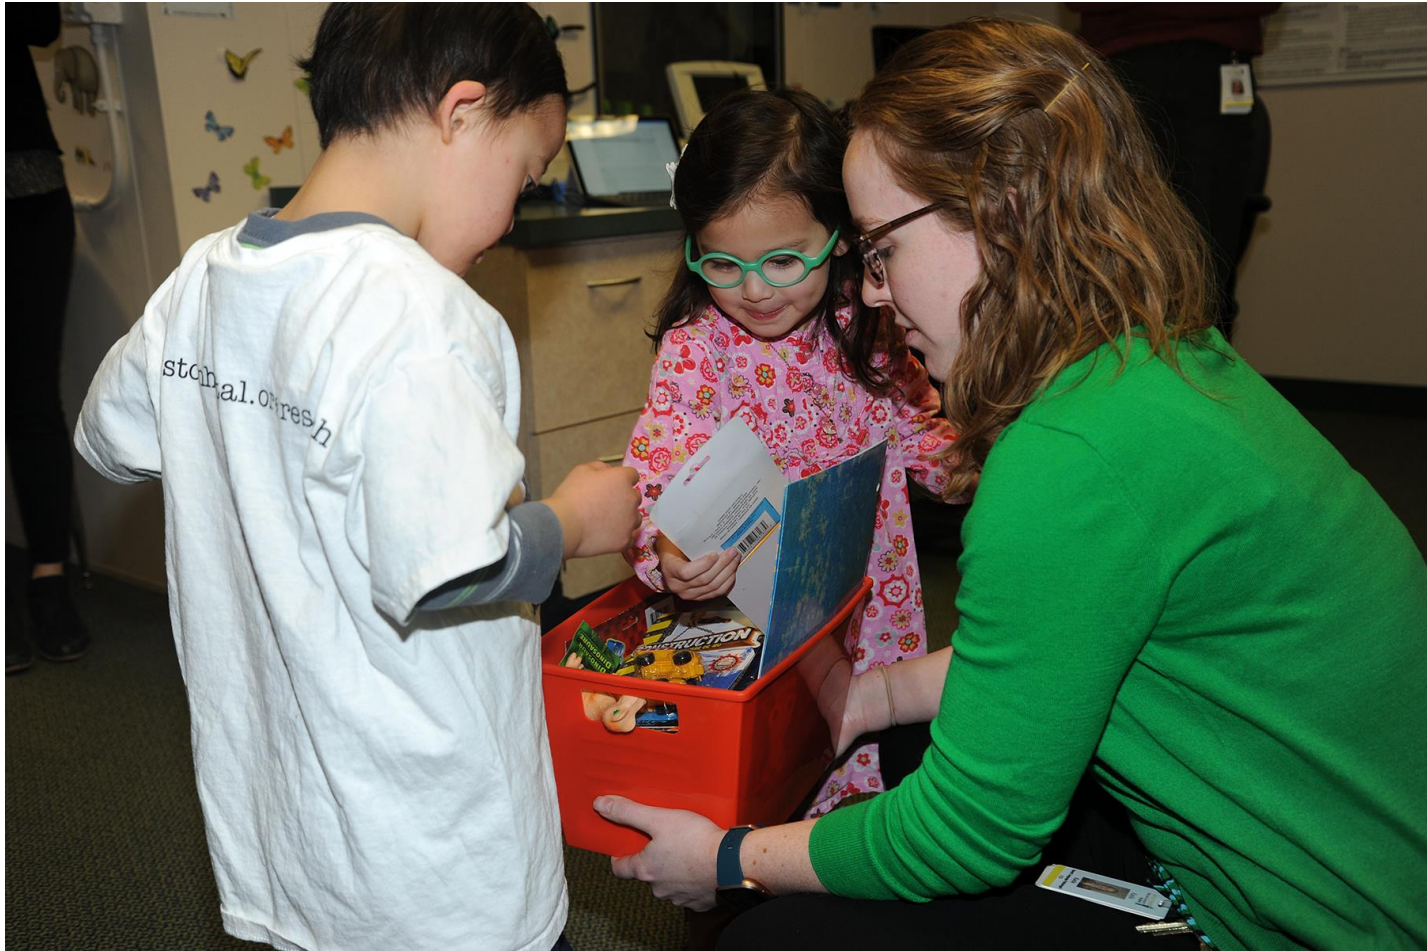

You will get another  
prize at the end!



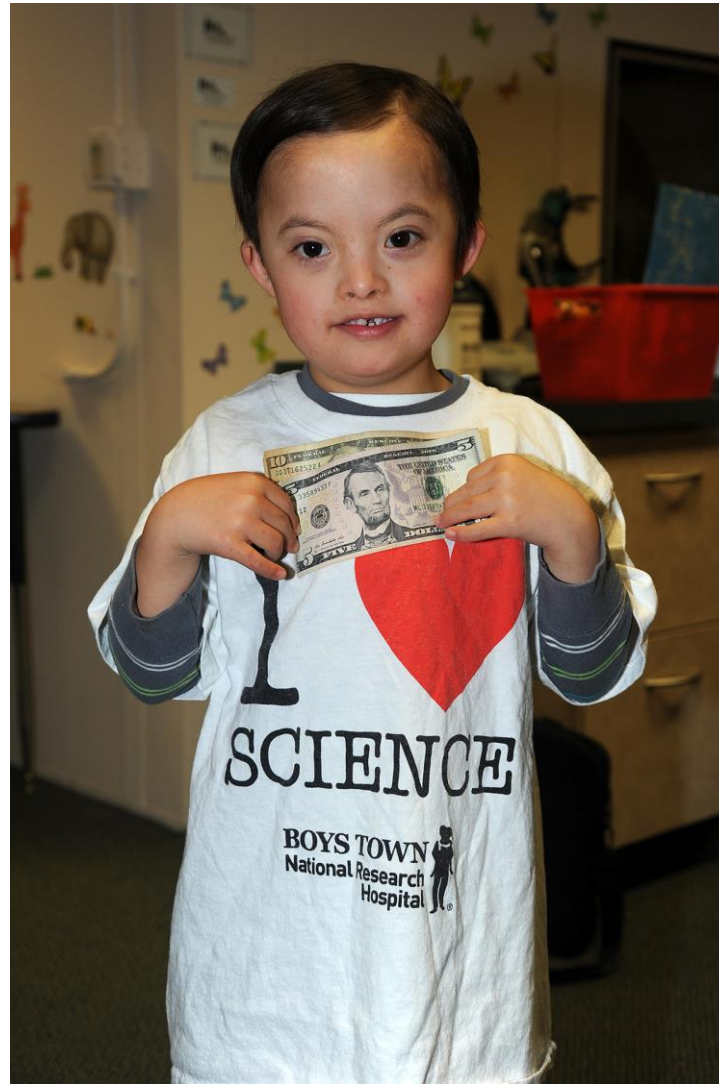

\$\$ You will earn more money. \$\$  
You worked hard!

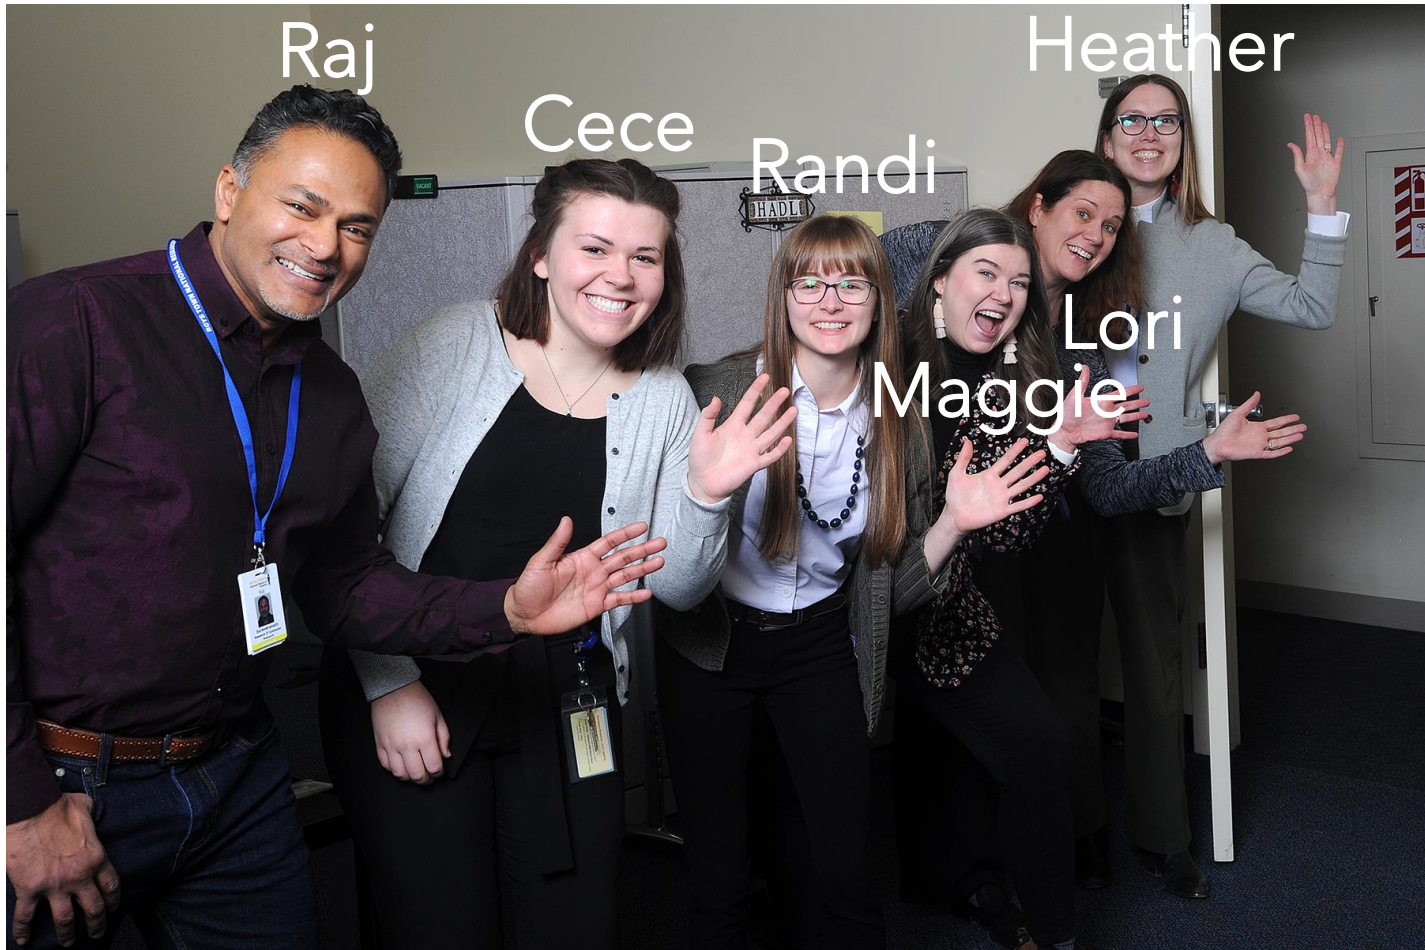

Thank you for visiting us!



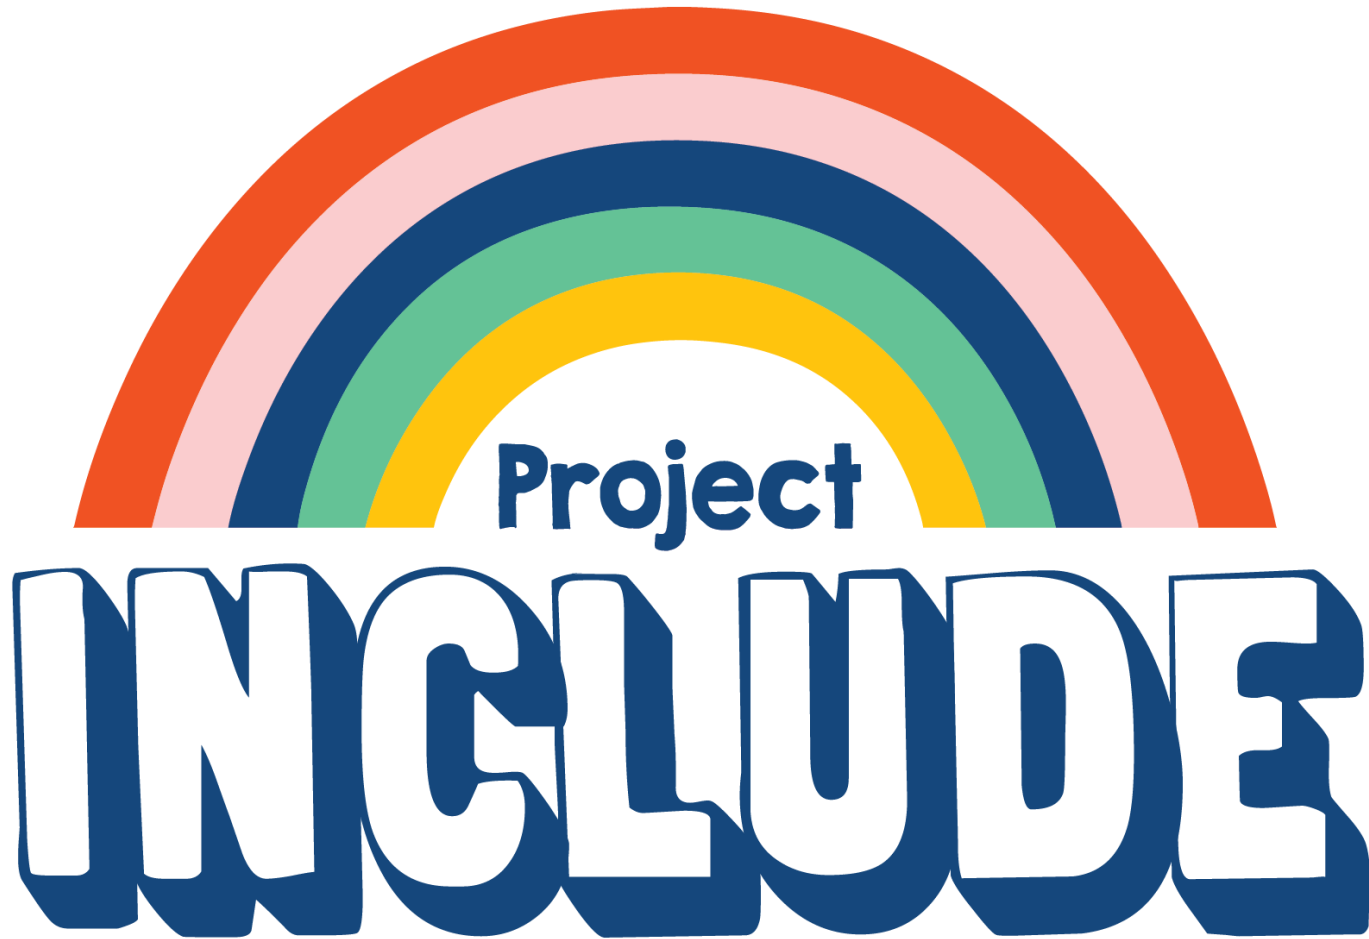

Supplement: Supplementary file 1 [file 1]
