# Supplementary material
Source: publisher figshare collection journal article supplement (https://asha.figshare.com/articles/dataset/_/21200422)

# Welcome to Boys Town Research Hospital!

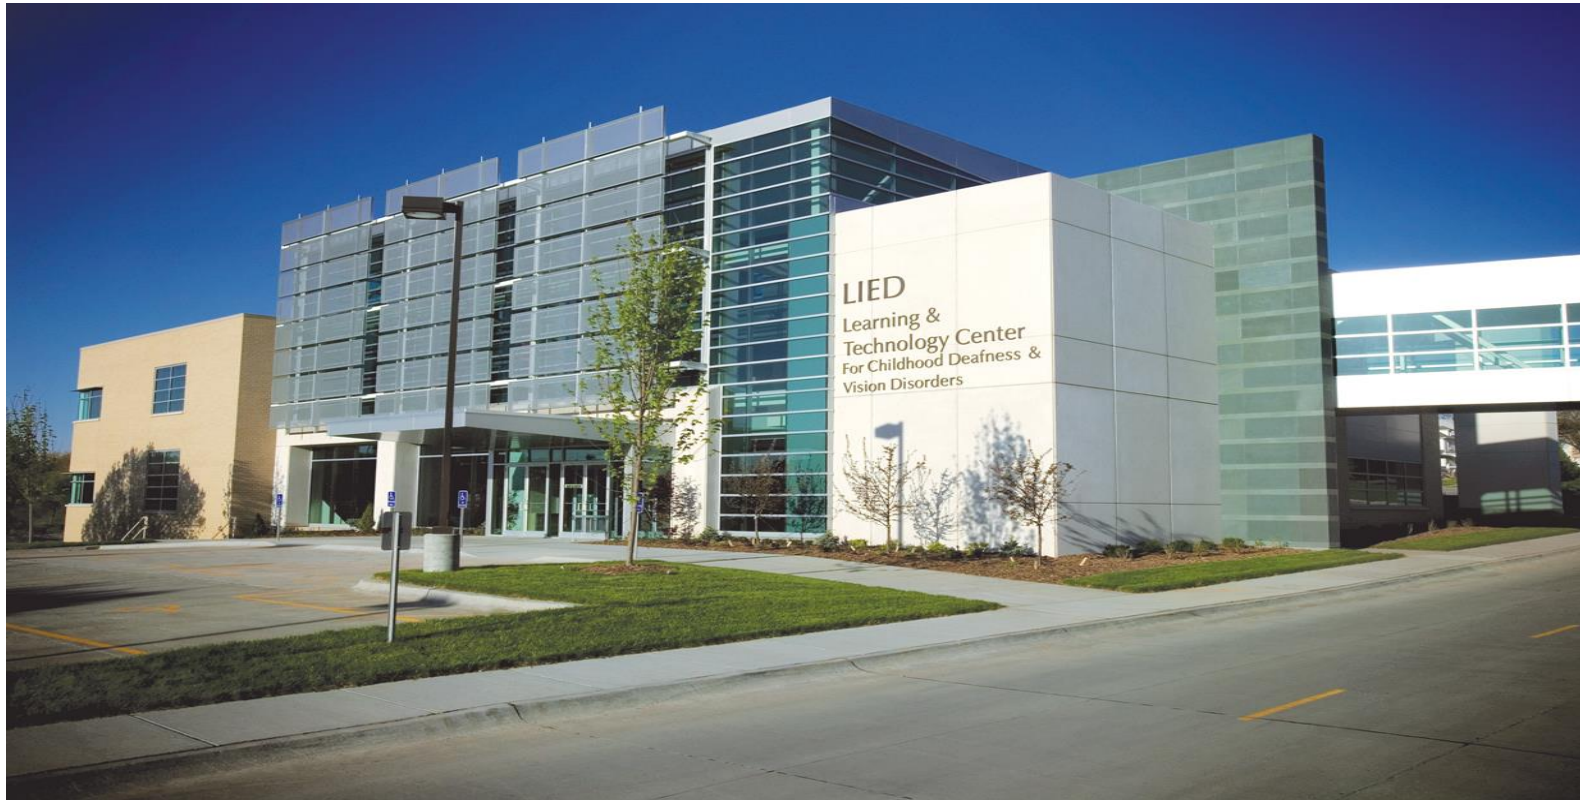

# Here is our lab!

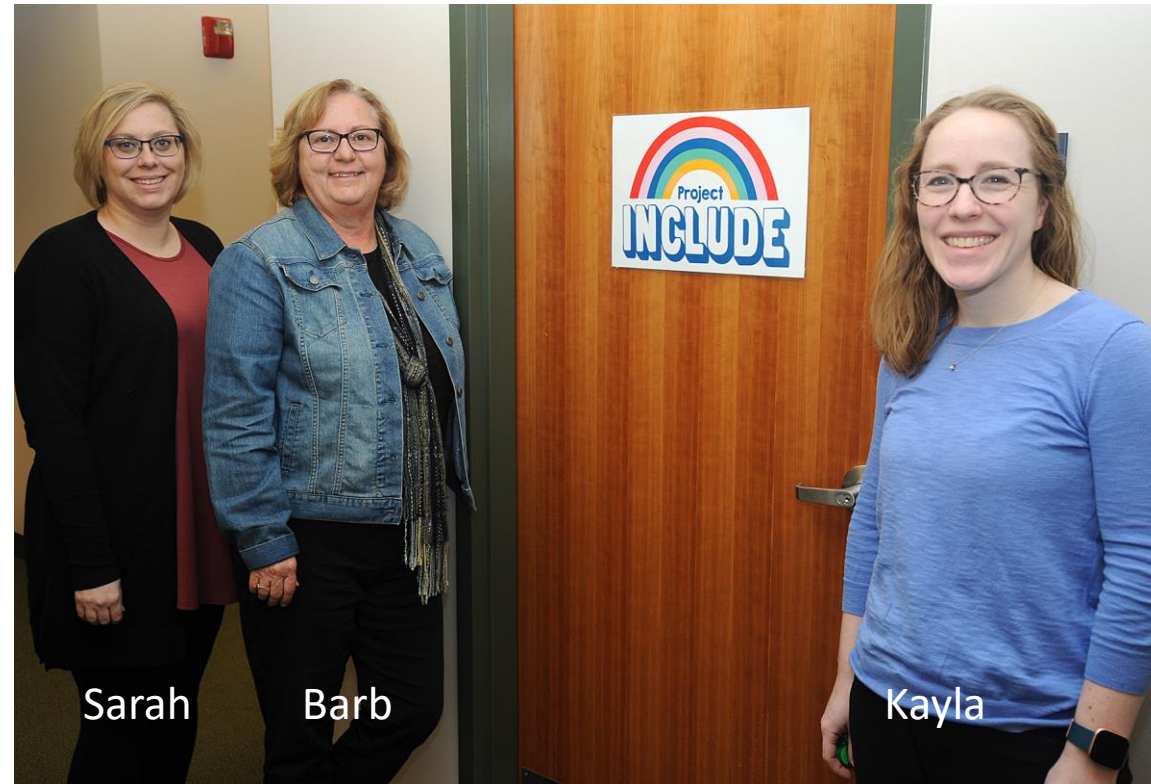

# You have paperwork!

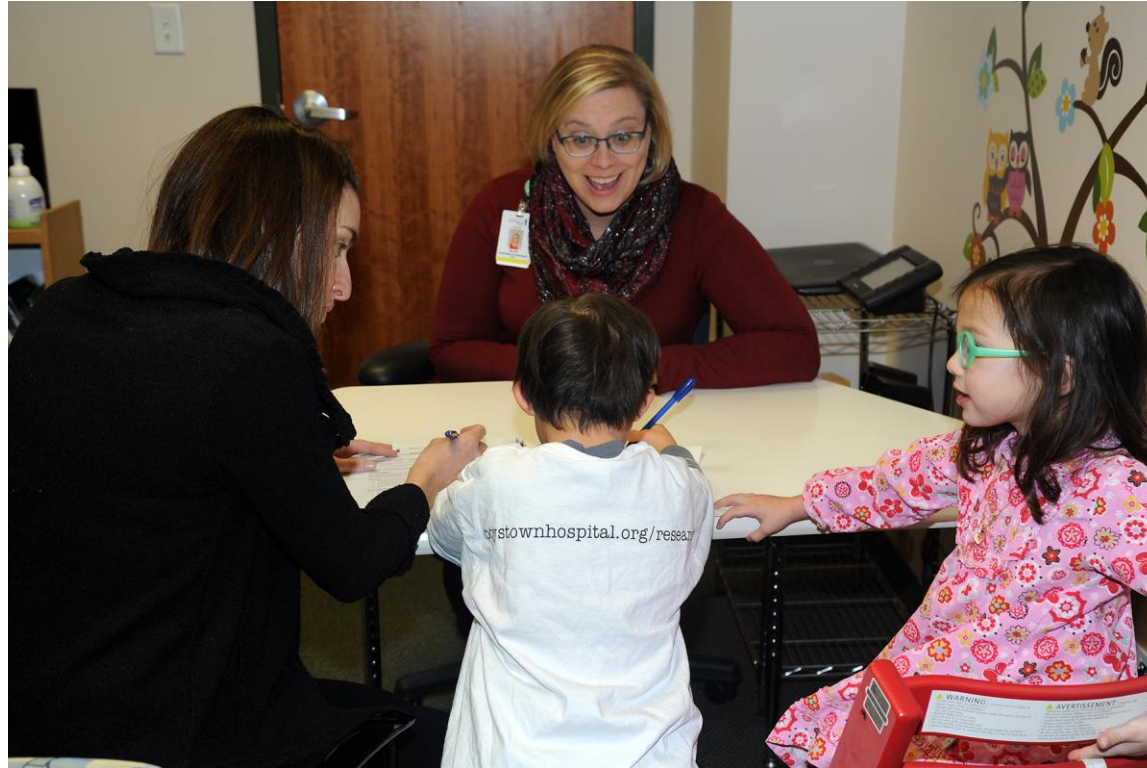



You can write  
your name.

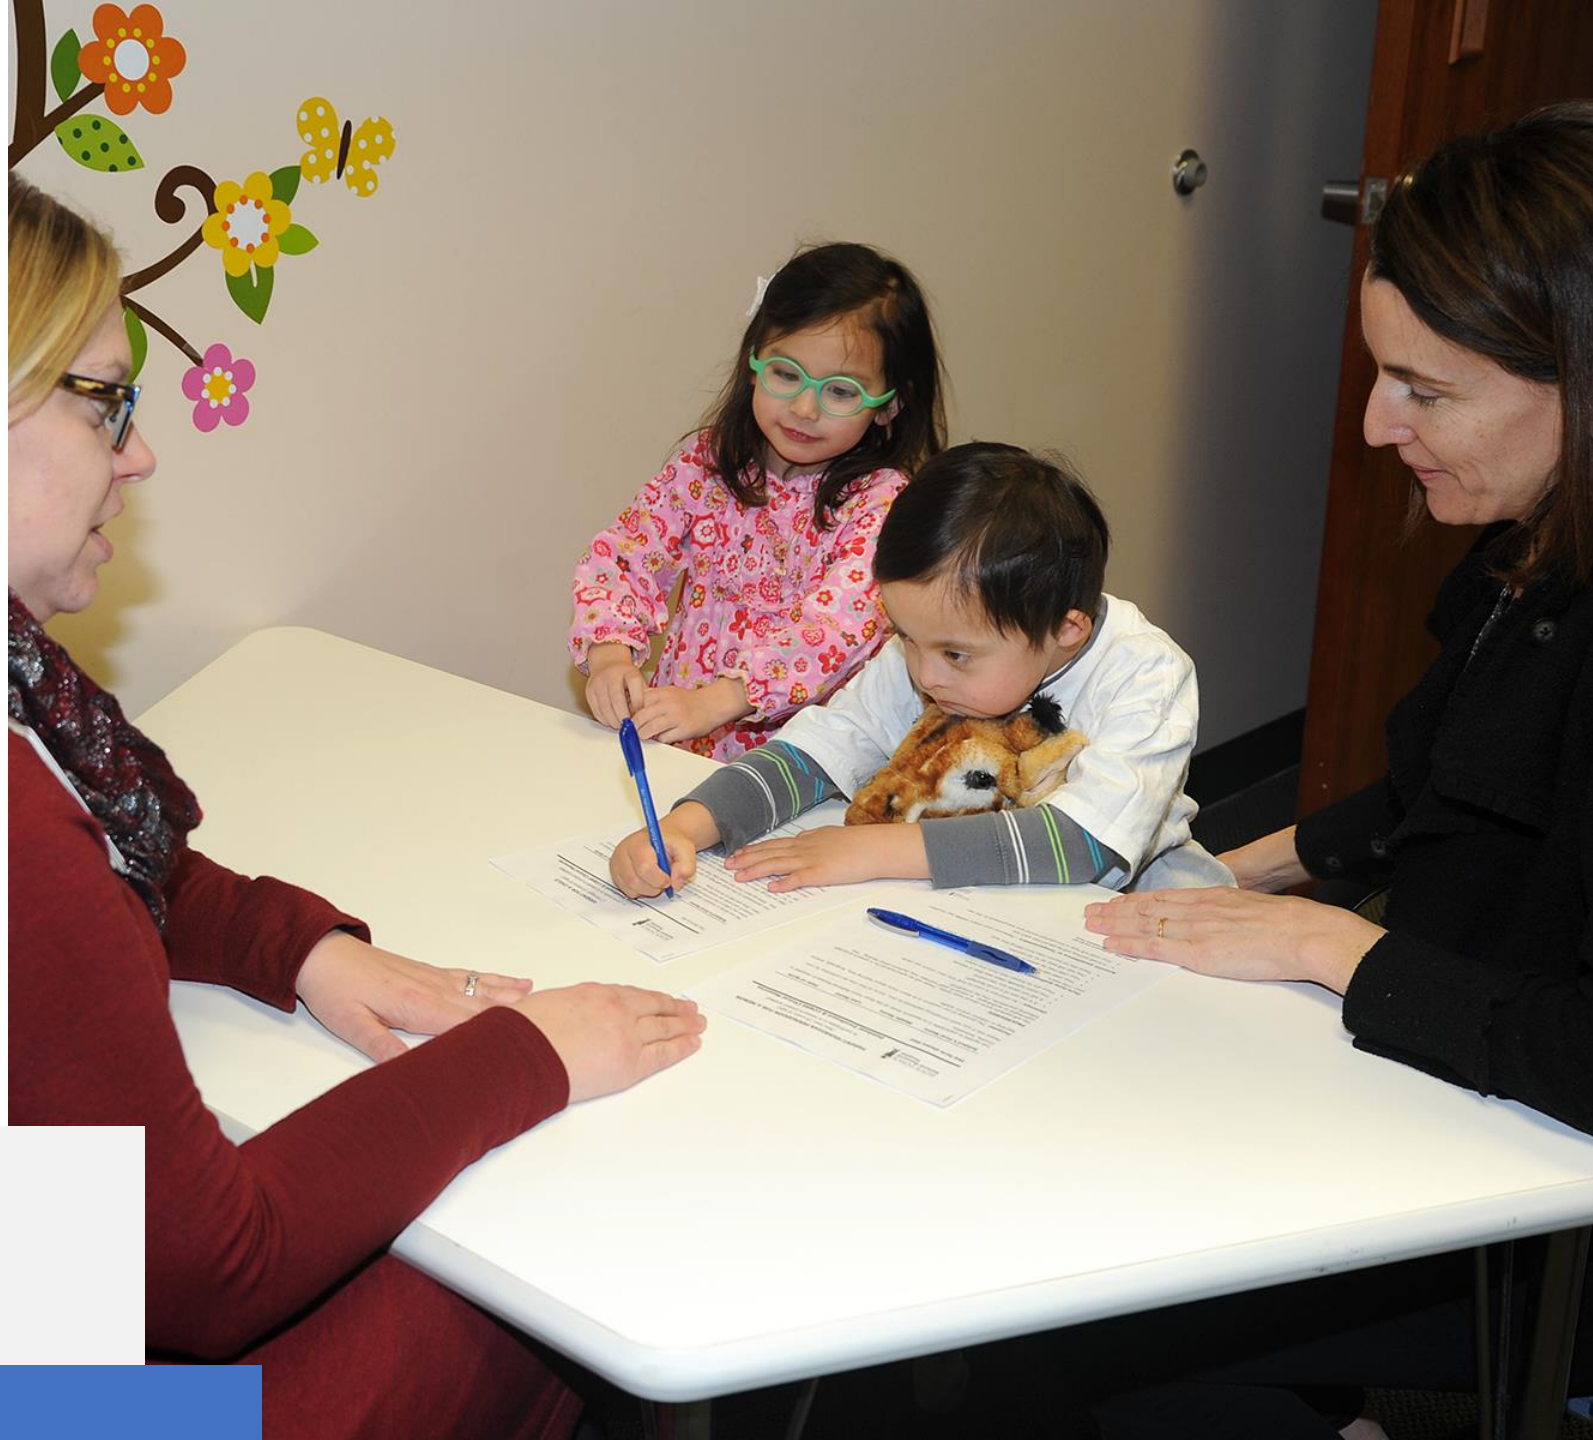



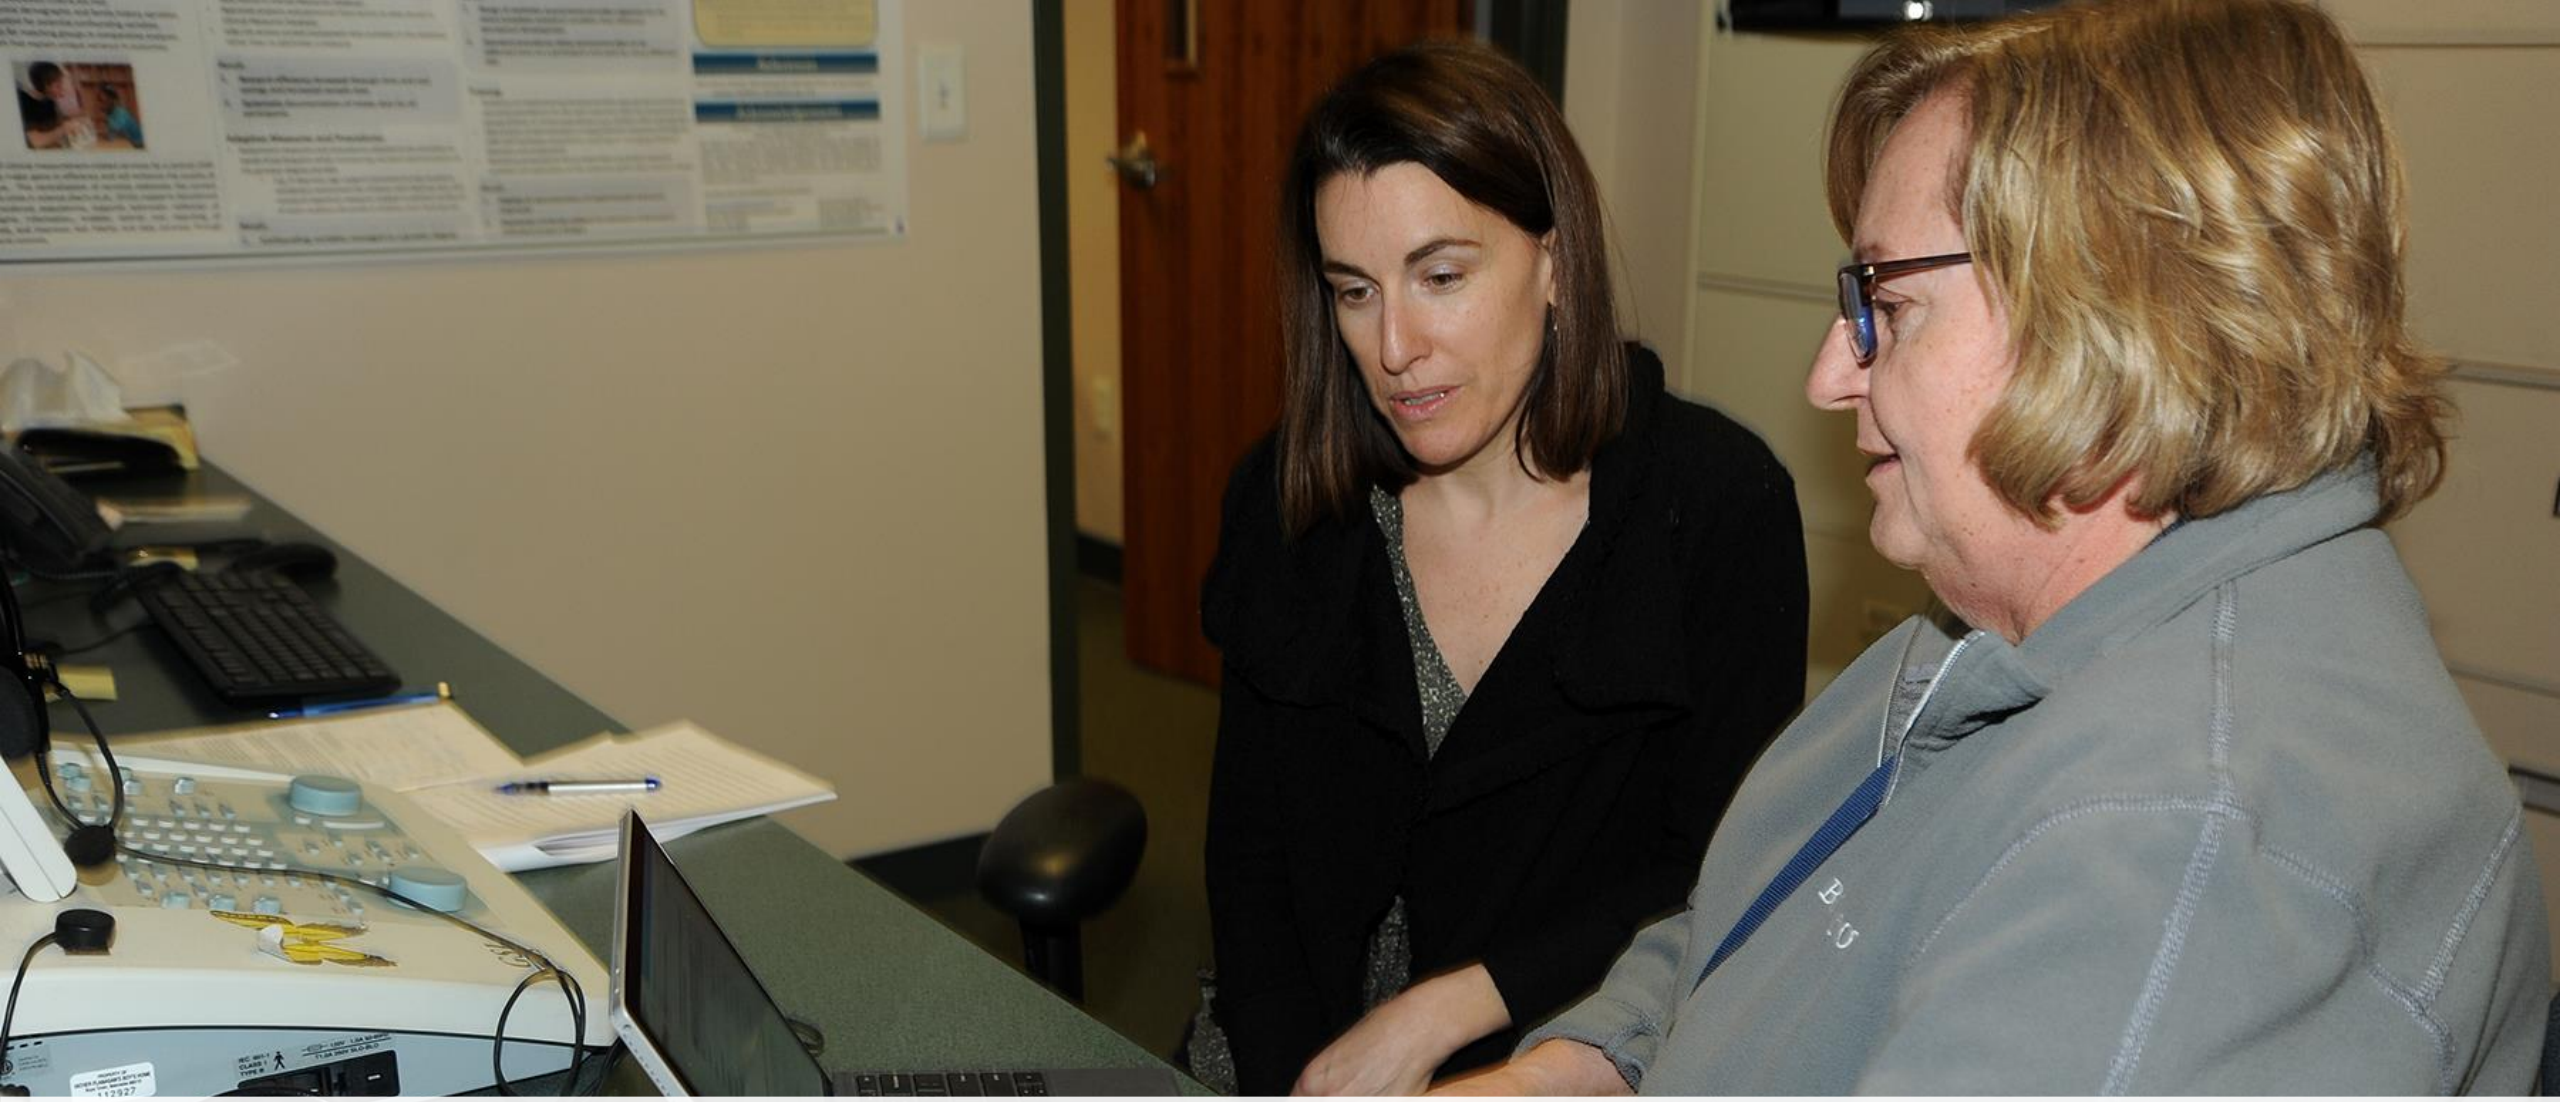

Your Mom or Dad will work with Barb.



You will play  
listening  
games.

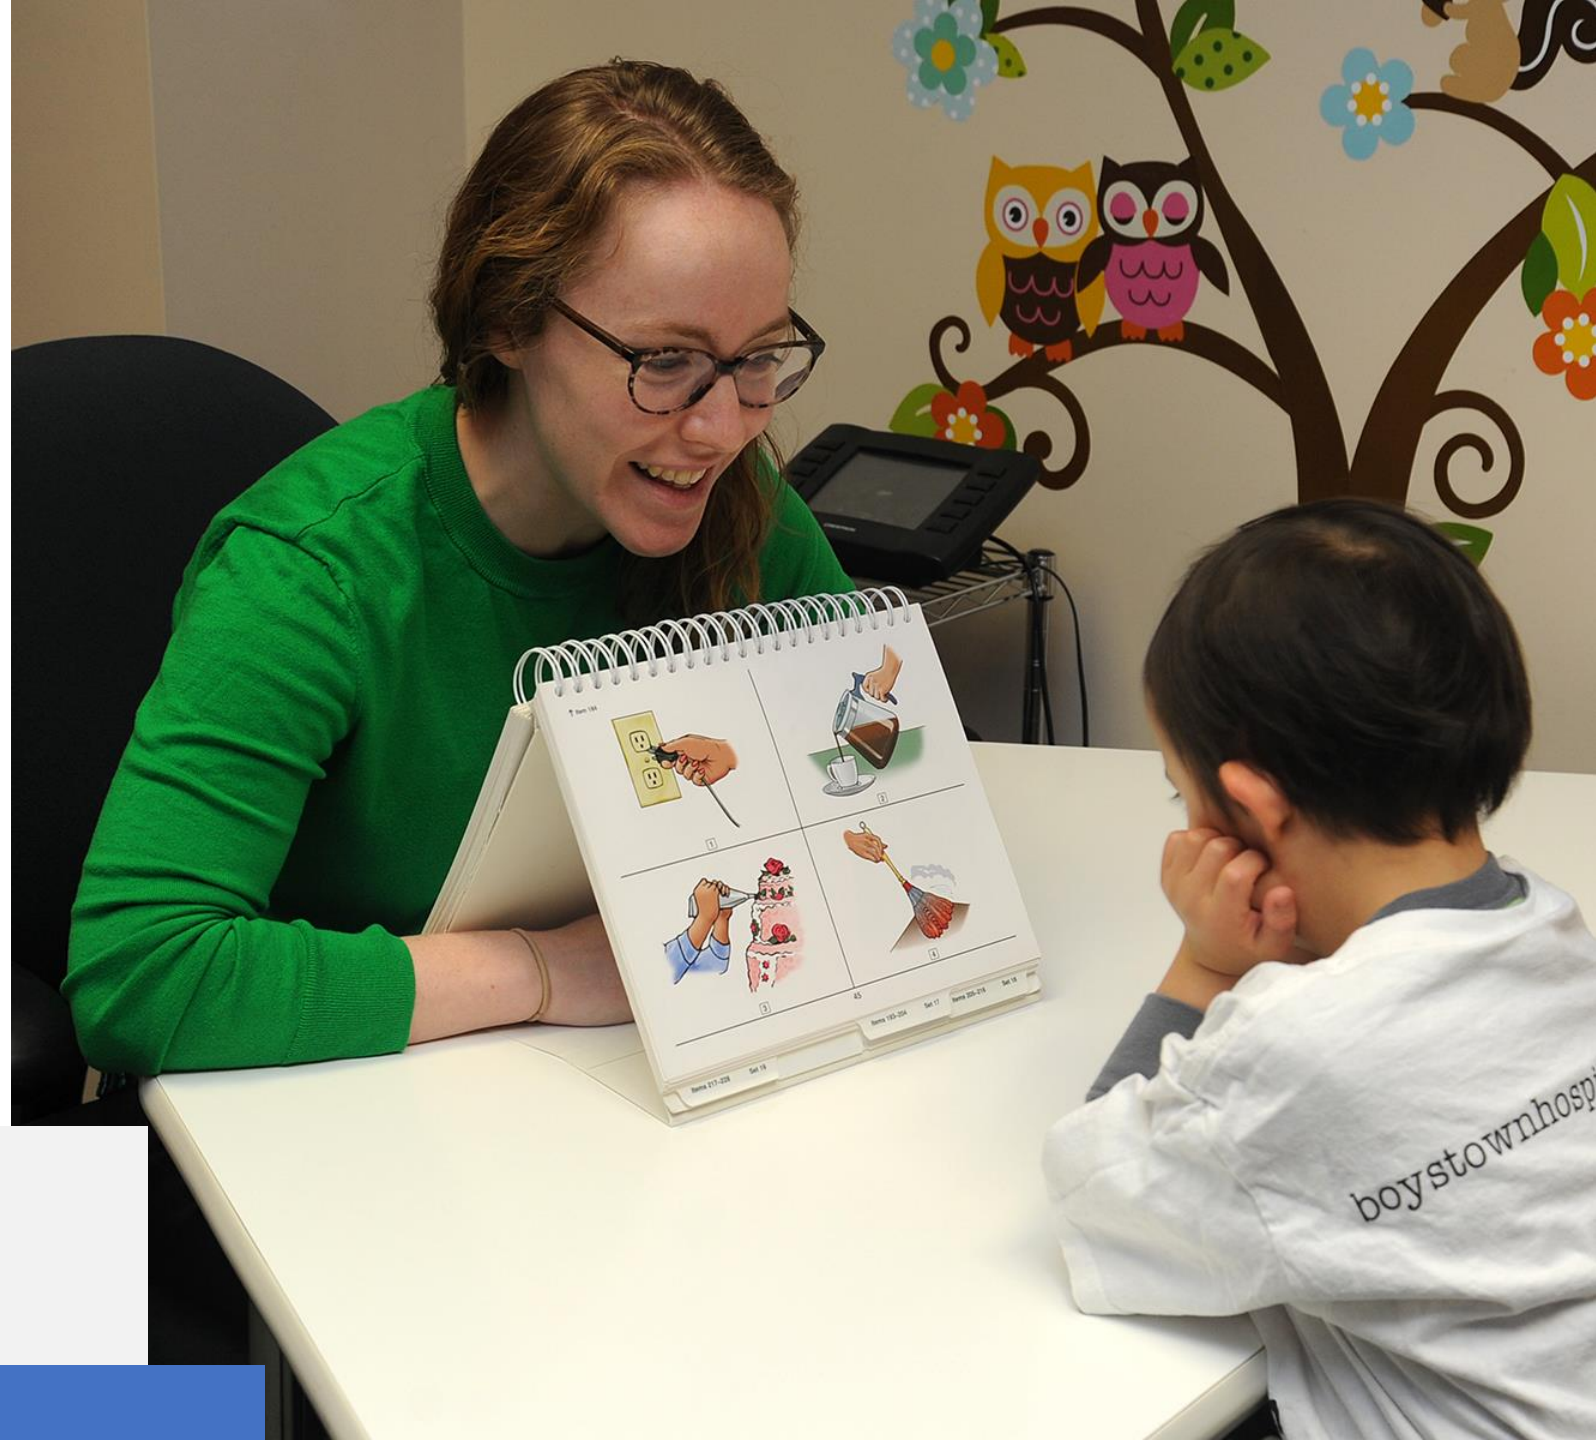

You will point  
at pictures.

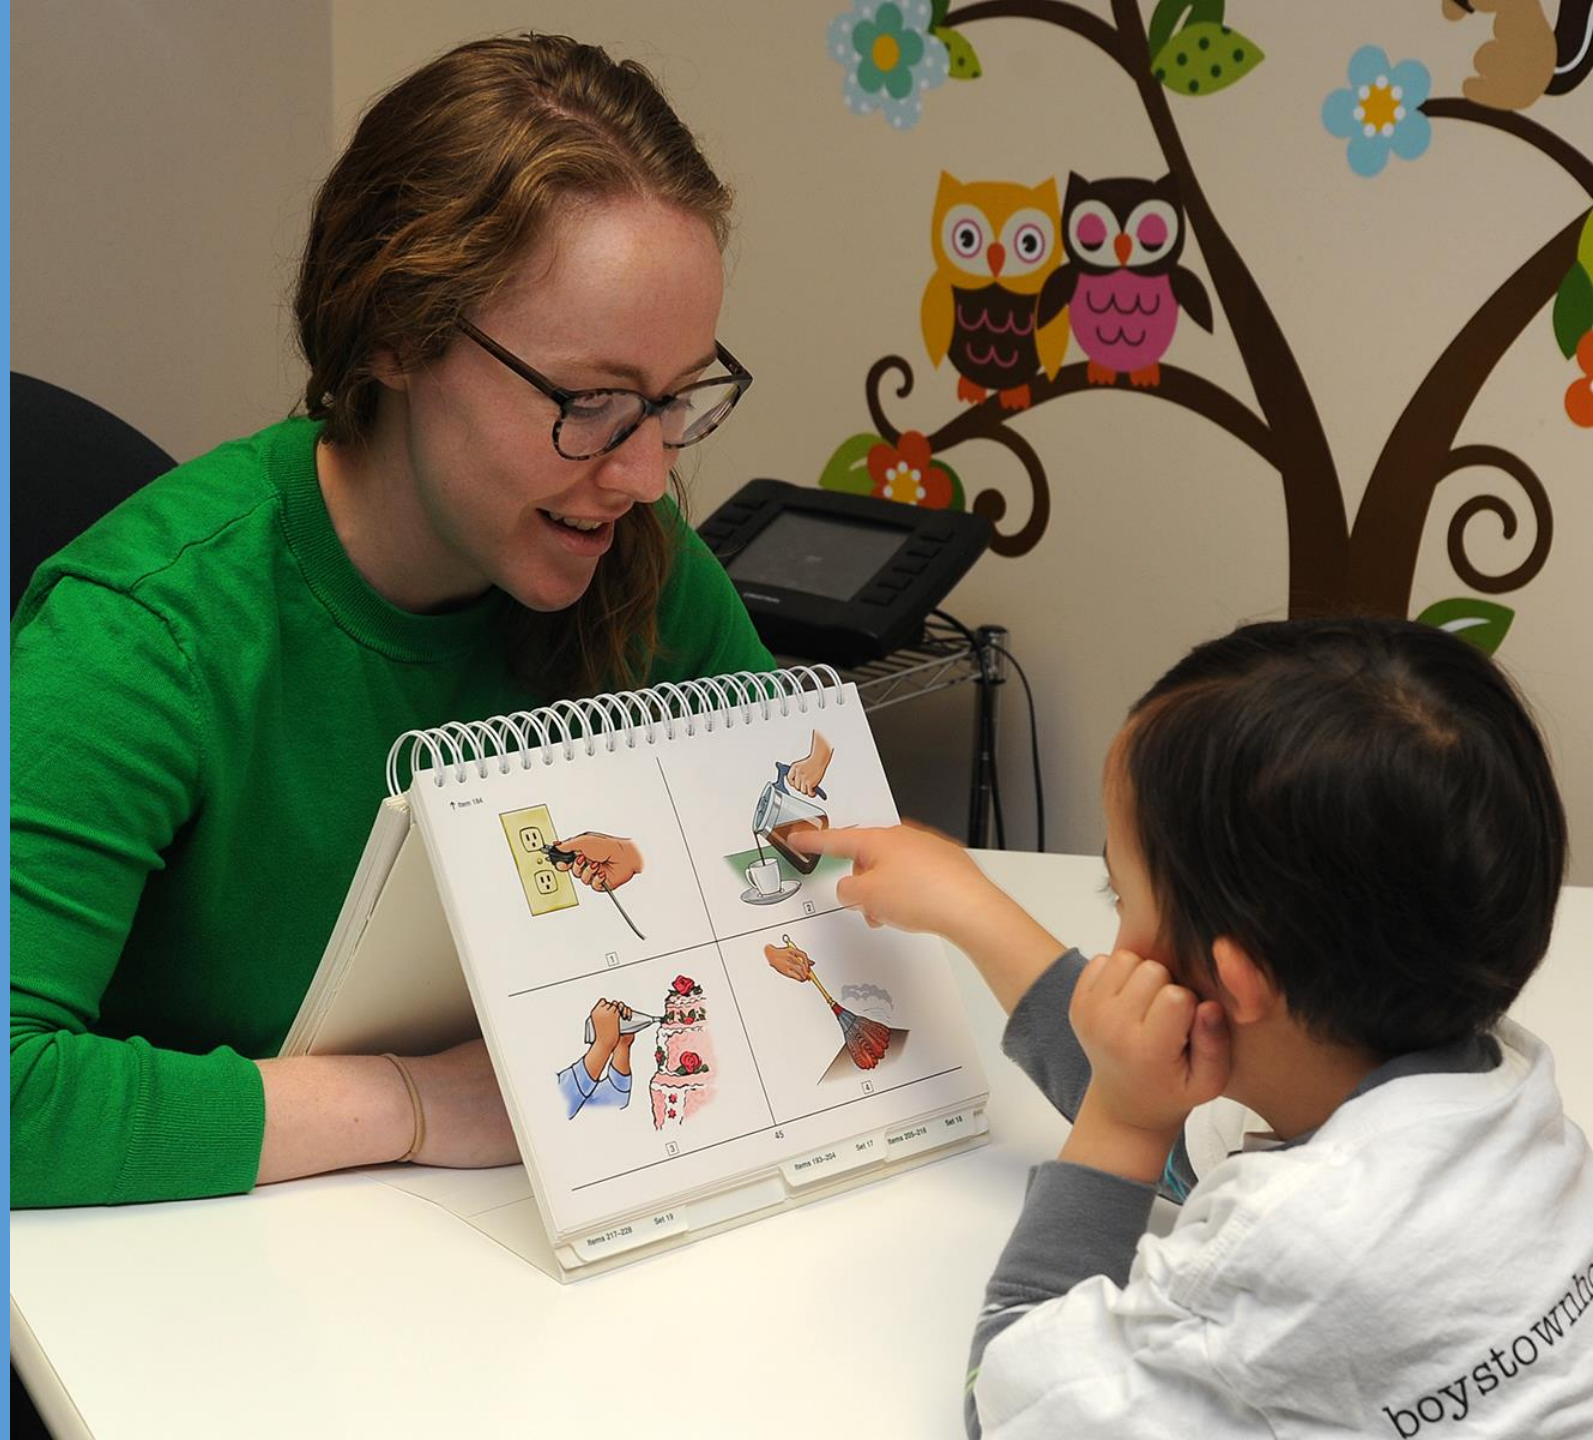



You will get  
a **prize** at  
the end!

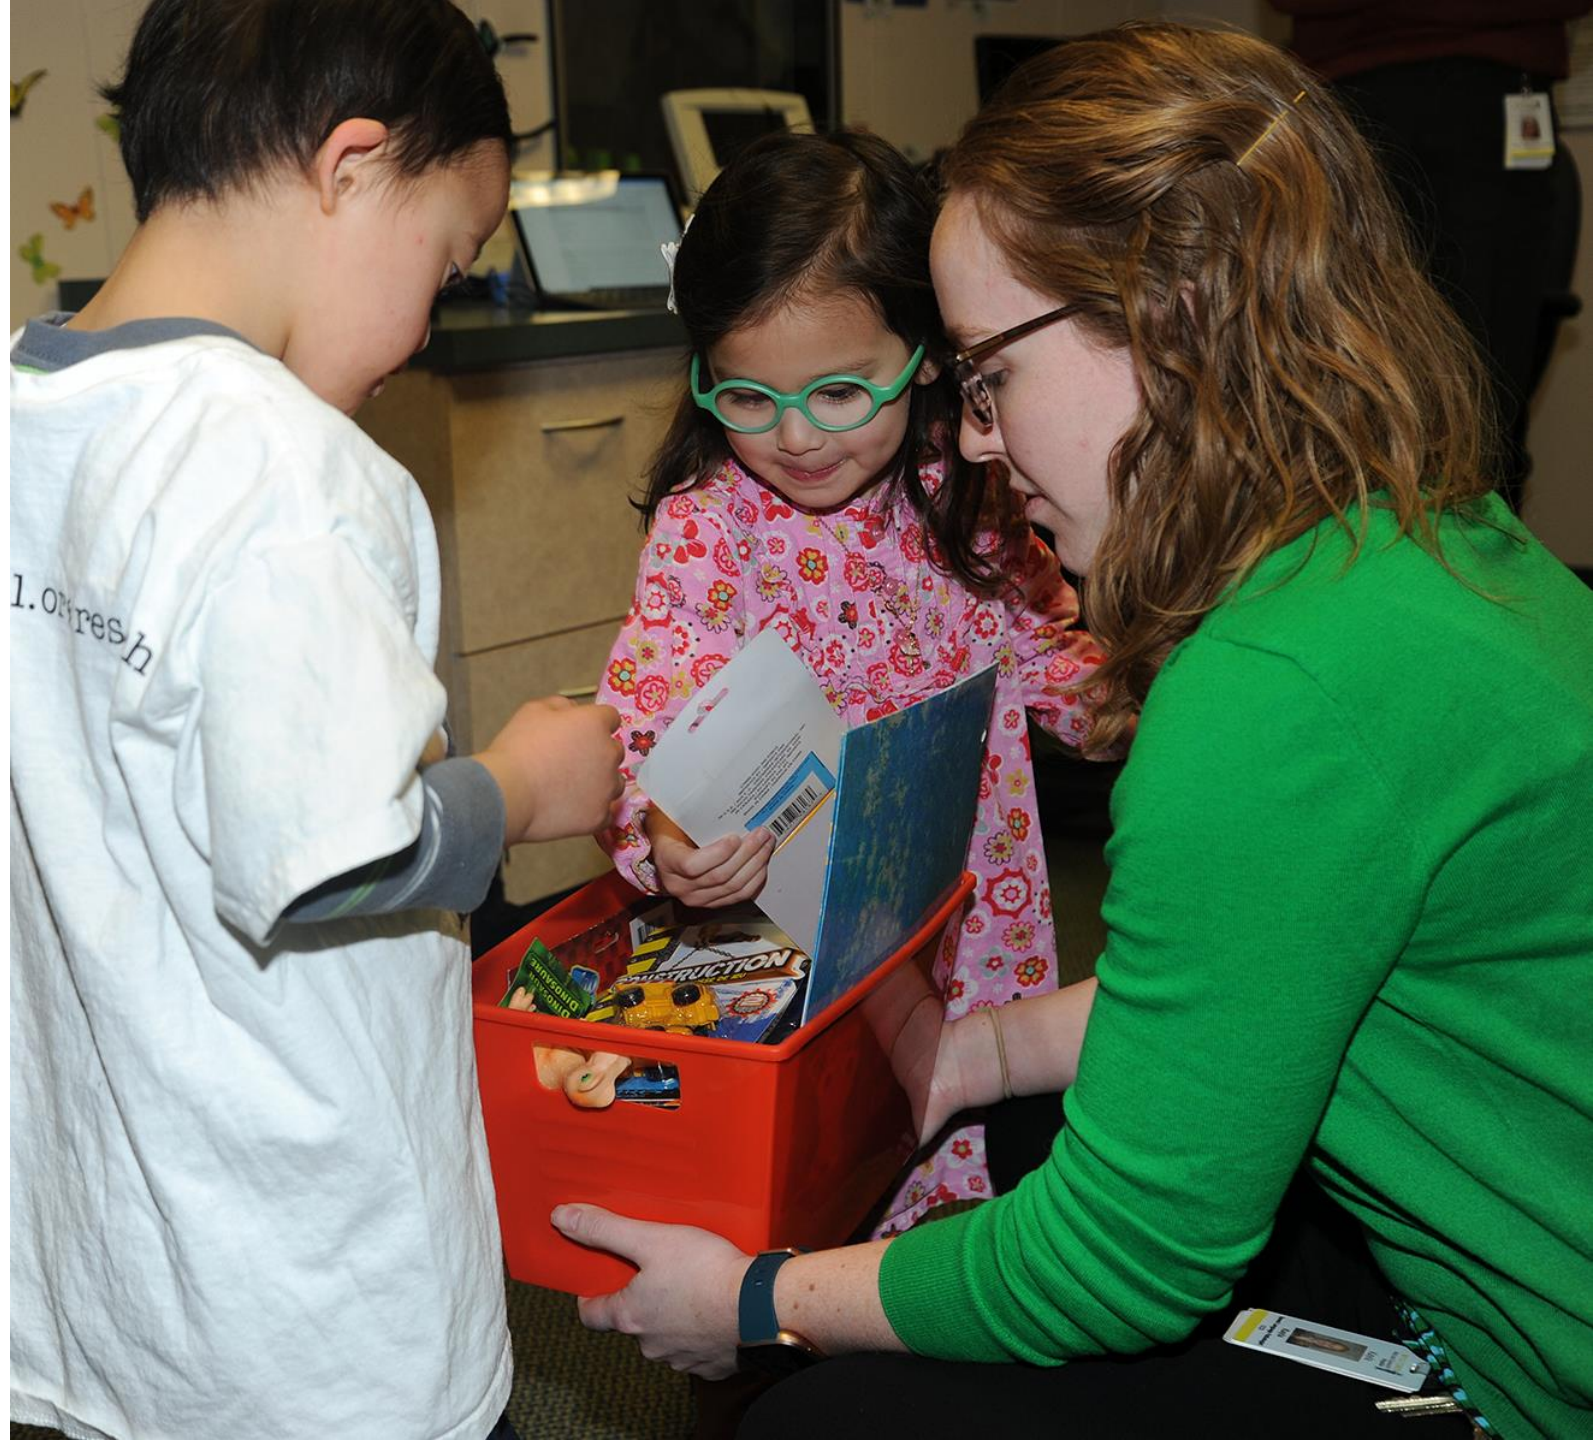



\$\$ You will earn money \$\$  
You worked hard!!

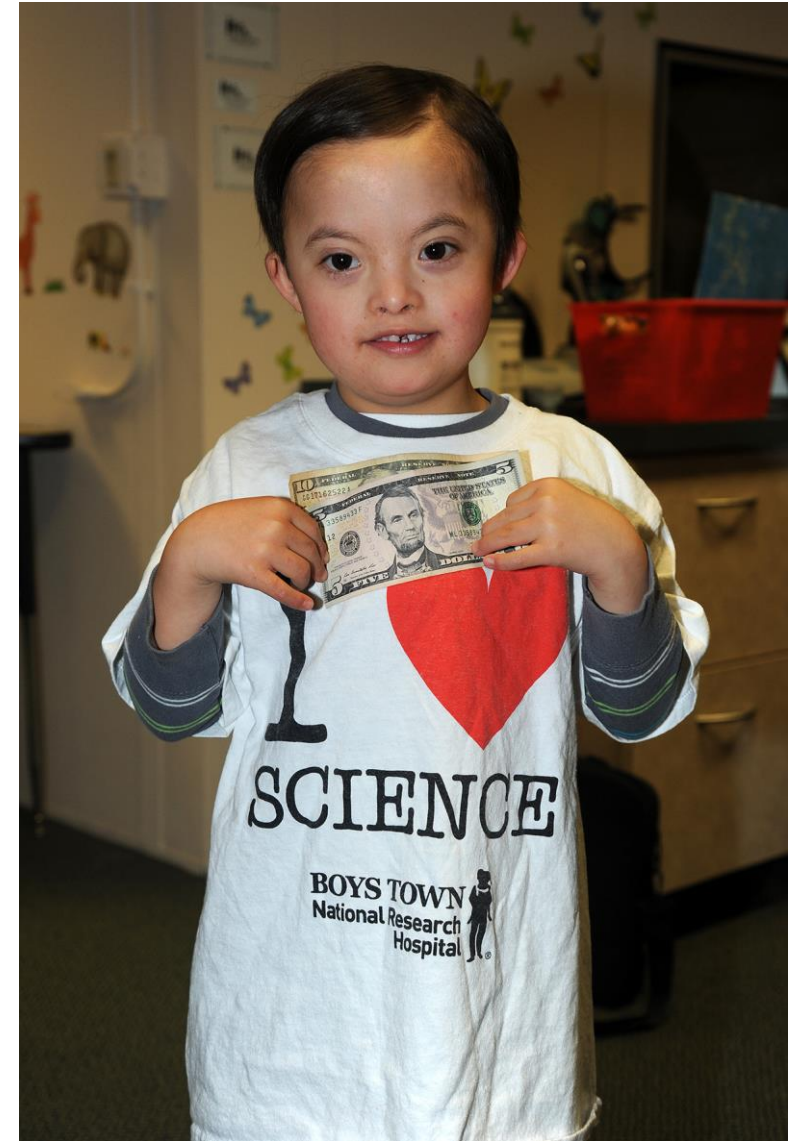

Remember you have two visits.  
This is who you will see on your next visit.

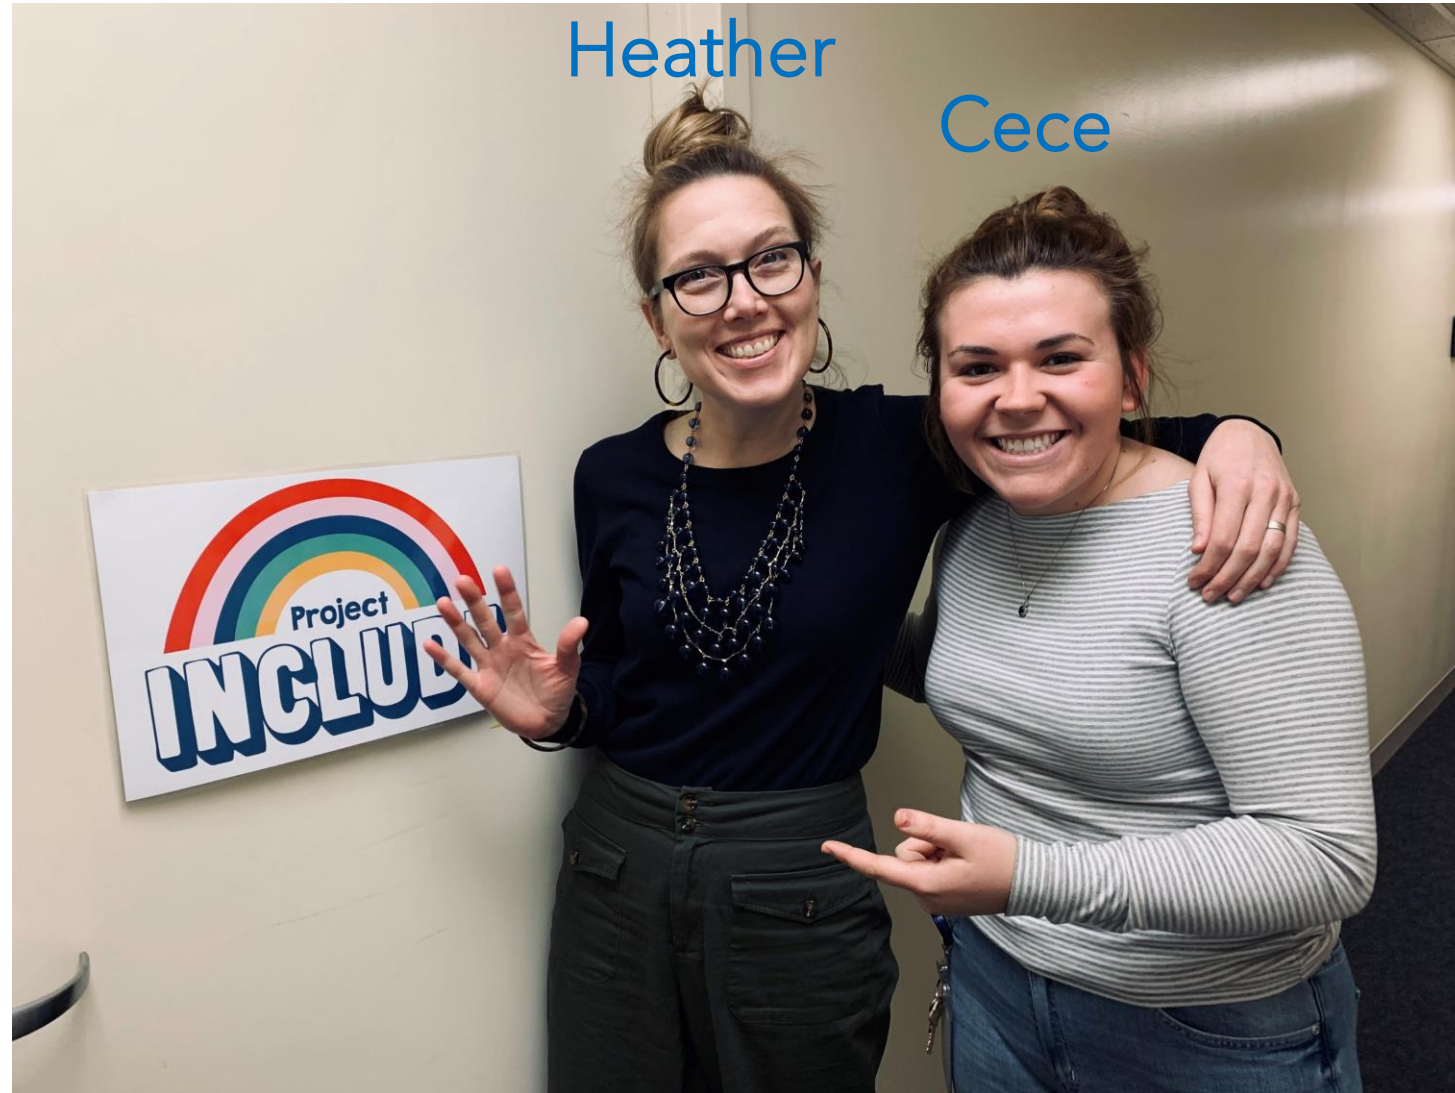

Supplement: Supplementary file 2 [file 1]
